1  
2  
3  
4  
5  
6  
7  
8  
9  
10  
11  
12  
13  
14  
15  
16  
17  
18  
19  
20  
21  
22  
23  
24  
25  
26  
27  
28  
29  
30  
31  
32  
33  
34  
35  
36  
37  
38  
39  
40

**Title:** An Animal Model to Study *Klebsiella pneumoniae* Gastro-Intestinal Colonization and Host-to-Host Transmission

**Authors:** Taylor M. Young<sup>1</sup>, Andrew S. Bray<sup>1</sup>, Ravinder K. Nagpal<sup>1,2</sup>, David L. Caudell<sup>3</sup>, Hariom Yadav<sup>1,2</sup>, and M. Ammar Zafar<sup>1</sup>

**Affiliations:**

<sup>1</sup> Department of Microbiology and Immunology Wake Forest School of Medicine, Winston-Salem, NC. USA.

<sup>2</sup> Department of Molecular Medicine, Wake Forest School of Medicine, Winston-Salem, NC USA.

<sup>3</sup> Department of Pathology-Comparative Medicine, Wake Forest School of Medicine, Winston-Salem, NC. USA.

**Corresponding Author:**

M. Ammar Zafar  
Wake Forest School of Medicine  
Biotech Place, Suite 210, Room 2E-022  
575 Patterson Ave  
Winston-Salem, NC 27101  
336-716-9083 - phone  
[mzafar@wakehealth.edu](mailto:mzafar@wakehealth.edu)

41  
42  
43  
44  
45  
46  
47  
48  
49  
50  
51  
52  
53  
54  
55  
56  
57  
58  
59  
60  
61

**Abstract.**

An important yet poorly understood facet in the life cycle of a successful pathogen is the host-to-host transmission. Hospital-acquired infections (HAI) resulting from the transmission of drug-resistant pathogens affect hundreds of millions of patients worldwide. *Klebsiella pneumoniae* (*Kpn*), a gram-negative bacterium, is notorious for causing HAI, with many of these infections difficult to treat as *Kpn* has become multi-drug resistant. Epidemiological studies suggest that *Kpn* host-to-host transmission requires close contact and generally occurs through the fecal-oral route. Herein, we describe a murine model that can be utilized to study mucosal (oropharynx and gastrointestinal [GI]) colonization, shedding within feces, and transmission of *Kpn* through the fecal-oral route. Using an oral route of inoculation, and fecal shedding as a marker for GI colonization, we show that *Kpn* can asymptomatically colonize the GI tract of immunocompetent mice, and modifies the host GI microbiota. Colonization density within the GI tract and levels of shedding in the feces differed among the clinical isolates tested. A hypervirulent *Kpn* isolate was able to translocate from the GI tract and cause hepatic infection that mimicked the route of human infection. Expression of the capsule was required for colonization and, in turn, robust shedding. Furthermore, *Kpn* carrier mice were able to transmit to uninfected cohabitating mice. Lastly, treatment with antibiotics led to changes in the host microbiota and development of a transient super-shedder phenotype, which enhanced transmission efficiency. Thus, this model can be used to determine the contribution of host and bacterial factors towards *Kpn* dissemination.

62  
63  
64  
65  
66  
67  
68  
69  
70  
71  
72  
73  
74

75  
76  
77

## 78 **Introduction.**

79

80 Host-to-host transmission of pathogens is the primary source of nosocomial infections,  
81 which are considered a serious threat to patient's health and also a significant burden on the  
82 healthcare system (1, 2). Hospital-acquired infections (HAI) account for ~100,000 deaths in the  
83 United States alone (3). A leading cause of these hospital-acquired infections and multiple  
84 outbreaks in hospitals around the world is *Klebsiella pneumoniae* (*K. pneumoniae*; *Kpn*), a  
85 member of the *Enterobacteriaceae* family that frequently causes pneumonia, bacteremia,  
86 pyogenic liver abscesses, and urinary tract infections (4), with most of these infections generally  
87 occurring in immunocompromised patients. With the rampant use of antibiotics *Kpn* isolates have  
88 become extensively drug-resistant, and some are now even considered pan-drug resistant,  
89 making the infections they cause extremely difficult to treat (5-7). For this reason, WHO  
90 lists *Klebsiella pneumoniae* as a critical pathogen for which new antibiotics and other therapies  
91 are urgently required to address this growing healthcare problem (8, 9). Further exacerbating  
92 treatment of *Kpn* infections is the recent identification of isolates termed "hypervirulent *K.*  
93 *pneumoniae*" (*hvKP*) that can cause disease, such as community-acquired pyogenic liver  
94 abscesses in healthy individuals (10-12). Patients recovering from *hvKP* infections often suffer  
95 from post-infectious sequelae that can lead to loss of limb or vision (13-15). These strains,  
96 originally isolated in the Pacific Rim, have since disseminated worldwide (10).

97

98 In the natural environment, the initial mucosal sites of colonization tend to be the  
99 oropharynx and the gastrointestinal (GI) tract (16, 17). These colonization events are generally  
100 asymptomatic (18). However, under certain circumstances, *Kpn* can gain access to other sterile  
101 sites in the host and cause disease. Epidemiological data suggest that many patients in hospitals  
102 are *Kpn* carriers in the GI tract, with a correlation between *Kpn* carriage and subsequent disease  
103 from the same isolate (19-21). Besides patients, hospital personnel can also be asymptomatic  
104 carriers of *Kpn*, and these silent carriers act as a reservoir from which *Kpn* can manifest disease  
105 within the same host or act as a source of transmission to a new host (18, 22-24).

106

107 Colonization resistance provided by the host microbiota plays a critical role in blocking  
colonization by pathogens. However, the use of antibiotics diminishes the microbial diversity in  
the GI tract, which potentially allows *Kpn* to readily colonize a host. Studies also show that

108 antibiotic treatment of mice predisposes them to a “supershedder” state where they shed resident  
109 gut pathogens at a higher number, which enhances host-to-host transmission (25, 26). It is,  
110 however, unclear whether antibiotic treatment in a hospital setting contributes towards the  
111 increased transmission of drug-resistant *Kpn*.

112 Our understanding of the *Klebsiella pneumoniae*-associated disease-state comes mainly  
113 from animal models studying lung and urinary tract infection. While these studies have identified  
114 bacterial and host factors that contribute to *Kpn* virulence, there is very little mechanistic  
115 understanding of the gastrointestinal colonization and host-to-host transmission. Close contact,  
116 especially in a hospital setting, is thought to promote the spread of *Kpn* from an infected host to a  
117 naïve host. Transmission is thought to occur via the fecal-oral route, either through poor hygiene  
118 or contact with contaminated surfaces (fomites) (20, 22-24).

119 Here, we describe a novel murine model to allow for the study of *Kpn* GI colonization,  
120 shedding, and host-to-host transmission. Employing an oral route of *Kpn* inoculation in an inbred  
121 mouse population, we investigated *K. pneumoniae* gastric colonization and transmission. We  
122 demonstrate that *Kpn* can stably colonize the GI tract without treatment of antibiotics, and these  
123 mice stay persistently colonized and can transmit *Kpn* to cage-mates. Furthermore, antibiotic  
124 treatment of carrier mice induces gut dysbiosis and triggers a transient supershedder phenotype.

125

## 126 **Materials and Methods.**

127

128 **Ethics Statement.** This study was conducted according to the guidelines outlined by National  
129 Science Foundation animal welfare requirements and the Public Health Service Policy on  
130 Humane Care and Use of Laboratory Animals (27). Wake Forest Baptist Medical Center IACUC  
131 oversees the welfare, well-being, and proper care and use of all vertebrate animals. The  
132 approved-protocol number for this project is A18-160.

133

134 **Bacterial growth conditions and strain construction.** Strains used in the study are listed in  
135 Table 1. *K. pneumoniae* isolates were grown in Luria-Bertani (LB) Broth Lennox, with constant  
136 agitation at 37°C. For all mouse infections, an overnight culture of *Kpn* was spun down at  
137 ~27000  $\times g$  for 15 minutes, and the resulting pellet resuspended in similar volume of 1X  
138 Phosphate-Buffered Saline (PBS). To obtain desired density for mouse infections ( $10^6$

139 CFU/100 $\mu$ l), the bacterial suspension in PBS was diluted into a 2% sucrose-PBS solution. Ten-  
140 fold serial dilutions were plated on selective media (LB-Agar with antibiotic) and incubated at  
141 30°C overnight for quantitative culture. LB plates containing antibiotics were streptomycin (str,  
142 500  $\mu$ g/ml), chloramphenicol (50  $\mu$ g/ml), ampicillin (25  $\mu$ g/ml), apramycin (50  $\mu$ g/ml),  
143 spectinomycin (30  $\mu$ g/ml) and rifampin (30  $\mu$ g/ml).

144 The *wzi* gene codes for a conserved outer membrane protein involved in the attachment  
145 of capsular polysaccharide to the outer membrane. Sequence polymorphism in the *wzi* gene has  
146 been used to identify and characterize different isolates. *Kpn* AZ10 (*wzi* 372) an antibiotic  
147 sensitive isolate was made str-resistant as described, subsequently mouse GI passaged and  
148 named AZ99 (28, 29). To construct the *fimH* mutant in the appropriate genetic background, PCR  
149 was carried out using Q5 polymerase (NEB) with AZ101 genomic DNA as template, and  
150 primers *fimH* upstream (GGCGGTGATTAACGTCACCT) and *fimH* downstream  
151 (GATAGAGCAGCGTTTGCCAC), which give at least 500bp homology on either end of the  
152 transposon cassette. The PCR product was purified using the Qiagen MinElute kit. Lambda Red  
153 mutagenesis was carried out as described previously (30), and cells were recovered in Super  
154 Optimal Broth with Catabolite repression (SOC) media at 30°C with shaking overnight.  
155 Recovered bacteria were plated on selective LB agar containing chloramphenicol (50  $\mu$ g/ml).  
156 Single colonies were purified and the mutation was confirmed by PCR.

157 To determine *fim* promoter orientation, PCR was carried out using either *in vitro* samples  
158 from LB broth, single colonies from LB plates, or *in vivo* samples (fecal pellets) from mice  
159 infected with *Kpn*. Broth culture was spun down as described above and resuspended in equal  
160 volume dH<sub>2</sub>O and boiled for 5 minutes. Also, a single colony was resuspended in 10  $\mu$ l of dH<sub>2</sub>O  
161 and boiled for 5 minutes. DNA was isolated from fecal pellets (100 mg) using Quick-DNA™  
162 Fecal/Soil Microbe Microprep (Zymo Research). 5  $\mu$ l of sample was used in PCR with OneTaq  
163 polymerase (NEB) with primers Cas168 GGGACAGATACGCGTTTGAT and Cas169  
164 GCCTAACTGAACGGTTTGA as described previously (31). Purified PCR product was  
165 digested with restriction enzyme *HinFI* (NEB) for 1 hour and resolved on 1.2% agarose gel. As  
166 established previously, the “off orientation” of the *fim* promoter results in product bands of  
167 496bp and 321bp, whereas the “on orientation” results in bands of 605bp and 212bp (31).

168

169 **Mouse Infections for Colonization and Shedding.** Colonies of C57BL/6J (SPF) mice obtained  
170 from Jackson Laboratory (Bar Harbor, ME) were bred and maintained in a standard animal  
171 facility at Biotech Place, Wake Forest Baptist Medical Center. All animal work was done  
172 according to the guidelines provided by the American Association for Laboratory Animal  
173 Science (AALAS) {Worlein, 2011 #87} and with the approval of the Wake Forest Baptist  
174 Medical Center Institutional Animal Care and Use Committee (IACUC). 5-7 week-old mice  
175 were infected and monitored through the course of the experiments. Food was removed from  
176 mice ~6 hours prior to inoculation. Mice were fed  $\sim 10^6$  CFU/100  $\mu$ l of *K. pneumonia* in two 50  
177  $\mu$ l 2% sucrose-PBS doses an hour apart, from a pipette tip. Immediately afterwards, food was  
178 returned to mice.

179 To quantify daily bacterial shedding, mice were removed from their housing and placed  
180 into isolation containers. Fecal pellets ( $\sim 0.02$  g, approximately 2 pellets) were collected and  
181 placed into a 2 ml screwcap tube (Fisherbrand, 02-682-558) along with at least 2 glass beads  
182 (BioSpec, 11079127). Samples were diluted 1:10 in PBS (weight:volume). A Bead mill 24  
183 (Fisherbrand) was used to homogenize the fecal pellets (2.1 power setting, 1 min). Afterwards,  
184 the tubes were spun in a mini centrifuge (Thermo Scientific, MySpin 6) to pellet out larger  
185 debris. Ten-fold serial dilutions were plated from the supernatant on appropriate antibiotic plates  
186 and incubated overnight at 30°C. Bacterial shedding was calculated in CFUs per gram of feces.  
187 The limit of detection was 100 CFU/g. Each mouse was uniquely marked so that the fecal  
188 shedding of each individual mouse could be tracked for the duration of the experiment.

189 To trigger an antibiotic-dependent *Kpn* supershedder phenotype, mice were infected  
190 orally with a str-resistant *Kpn* as described above. Four to five days post-inoculation (p.i) mice  
191 were gavaged with streptomycin (5 mg/200  $\mu$ l) either once or on three consecutive days, and  
192 daily shedding monitored post-antibiotic treatment. To determine effect of neomycin treatment  
193 before *Kpn* infection, mice were gavaged with a single dose (5 mg/200  $\mu$ l) 24 hours before  
194 inoculation with the MKP103 a derivative of KPNIH1 isolate with a deletion of the KPC-3  
195 carbapenemase-encoding gene (32). Bacterial counts were enumerated from fecal pellets as  
196 described above. To determine the role of continuous antibiotic treatment on supershedder  
197 phenotype, the drinking water was replaced with water containing 1g/L ampicillin 24 hours  
198 before infection; mice were maintained on ampicillin-water for 10 day p.i. after which they were

199 placed on regular water until the end of the experiment. *Kpn* fecal shedding was assessed up to  
200 20 days post-infection, and quantified as described above.

201 For competition experiments, mice were infected with a 1:1 mixture of AZ94 and the  
202 mutant of interest. Fecal shedding of both strains was assessed as described above. Fecal  
203 homogenates were plated on both apramycin (50 µg/ml) and str (500 µg/ml) LB agar. The  
204 competitive index (CI) was calculated as described previously (33), using the following  
205 equation:

$$\text{Log}_{10} \text{CI} = \frac{\text{Mutant output} / \text{WT output}}{\text{Mutant input} / \text{WT input}}$$

209 A value of 0 would suggest that neither strain has an advantage. A value >1 would suggest that  
210 the mutant has competitive advantage, whereas a value <1 would indicate the WT has the  
211 advantage.

212 To determine colonization density in the GI tract, ileum, cecum, and colon were removed  
213 under sterile conditions immediately following CO<sub>2</sub> (2 liters/min, 5 min) euthanasia of animals  
214 and subsequent cardiac puncture. The cecum, proximal colon, and a span of the terminal section  
215 of the ileum equal in length to the colon were removed from each animal. Organs were weighed  
216 and placed into individual 2 ml screwcap tubes (Fisherbrand, 02-682-558) with at least 2 glass  
217 beads (BioSpec Products, 11079127). Samples were diluted 1:10 in PBS (weight:volume) and  
218 were homogenized and plated as described above. The limit of detection was 100 CFU/g.

219 To determine colonization density in the kidney, liver and spleen, organs were removed  
220 under sterile conditions immediately following euthanasia as described above. Organs were  
221 weighed and placed 15 ml conical tubes. For kidney and liver equal weight to volume PBS was  
222 added, and samples were homogenized using PowerGen 700 (Power setting 2 for 30 seconds),  
223 whereas for spleen, ten times the volume of 1X PBS was added to the weight of the organ and  
224 homogenized as above. The samples were plated as described. The limit of detection of kidney  
225 and liver was 33 CFU/ml and for spleen 100 CFU/ml.

226 Oropharyngeal lavage was carried out with 200 µl of sterile PBS from a gavage needle  
227 inserted into the esophagus. The esophagus was exposed and cut transversely. A gavage needle,  
228 attached to a prefilled insulin syringe (BD) with 1X PBS was then inserted into the cut  
229 esophagus, and PBS collected from the mouth. The collected lavage was serially diluted and

230 plated on appropriate antibiotic plates and incubated overnight at 30°C. The limit of detection for  
231 oral lavage was 33 CFU/ml.

232

233 **Transmission Studies.** For 4:1 and 1:4 transmission experiments C57BL/6J index mice (n=1 or  
234 n=4) at 5-7 weeks of age are infected with *Kpn* as described above, and shedding is collected  
235 daily to determine colonization density of the GI tract. On day 4 p.i., contact mice (n=4 or n=1)  
236 were introduced to cages with the index mice. Fecal shedding of index and contact mice was  
237 collected and quantified for at least 6 days post-cohousing, for a total of 10 days for index mice  
238 and 6 days for contact mice. On day 10, the mice were euthanized as described above and the  
239 ileum, cecum, colon, and oral lavages of all mice were processed as described above to  
240 determine colonization density of *Kpn*.

241 In 1:4 transmission experiments, in which the administration of a single dose of antibiotic  
242 was assessed, index mice were infected with a str-resistant *Kpn* and fecal shedding of *Kpn* was  
243 quantified for 4 days p.i. On day 5 p.i, index mice were treated with streptomycin (5 mg/200 µl)  
244 via gavage and then co-housed with contact mice. Fecal shedding was collected daily from index  
245 and contact mice. In a continuous antibiotic challenge transmission study, an index mouse was  
246 put on water containing ampicillin (1 g/L) 24 hours before infection. The contact mice were  
247 placed on water containing ampicillin (1 g/L) 24 hours before introduction of the index mouse.  
248 Once co-housed, daily shedding was collected from both index and contact mice to determine if  
249 any transmission events occurred.

250 To confirm that host-to-host transmission events occur through the fecal oral route, a  
251 metabolic cage (Tecniplast Cat. # 3700M022) was used. *Kpn* infections were carried out as  
252 described above. 4 days post-infection, a contact mouse was introduced into the metabolic cage  
253 and fecal shedding collected from both index and contact mice to determine transmission  
254 frequency.

255

256 **Histology.** Mice were infected with either PBS (vehicle-only control) or a KPPR1S isolate. A  
257 subset of *Kpn*-infected mice were gavaged with streptomycin (single treatment; 5 mg/200 µl) to  
258 induce the super-shedder state at 5 days p.i. As a positive control, mice were put on 3% w/v  
259 Dextran Sodium Sulfate (DSS) molecular weight 50,000 in their drinking water *ad libitum* for 7  
260 days. All the mice were euthanized at day 7 post initial treatment or infection. 2.5 cm of colon



261 immediately distal to the cecum was collected, washed with 1x PBS, and prepared using the  
262 Swiss roll method. Afterwards the sample was preserved in 1:10 Formalin (Fisherbrand, 305-  
263 510), and after 24 hours transferred to 70% ethanol. The samples were embedded in paraffin  
264 before being sectioned, mounted, and stained with hematoxylin and eosin (H & E). The resulting  
265 slides were scored by the Wake Forest Baptist Medical Center Pathology department.

266 Liver was collected under sterile conditions from either mock infected mice or from  
267 orally infected mice with hvKP1, and in extremis. Liver samples were cut in to sections about  
268 6.5mm, and placed in 10% formalin (10 parts formalin to 1 part tissue). After 24-48 hours the  
269 samples were transferred to 70% Ethanol and stored at 4°C till they were further processed for H  
270 & E and Gram staining, with scoring carried out as described above.

271  
272 **Fecal microbiome Analysis.** Fecal microbiome was examined according to previously described  
273 methods (34-36). Briefly, genomic DNA from 200 mg feces was extracted using MoBio  
274 Powerfecal DNA kit (Qiagen, Valencia, CA) per manufacturer’s instructions. Amplicon PCR of  
275 the V4 hypervariable region of the 16S rDNA gene was performed using the universal primers  
276 515F (barcoded) and 806R according to the Earth Microbiome Project protocol (PMID:  
277 22402401). The amplicons were purified using AMPure<sup>®</sup> magnetic beads (Agencourt), and the  
278 products quantified with Qubit-3 fluorimeter (Invitrogen). The final amplicon library was  
279 generated as previously described (37). Equimolar pooled library was sequenced on an Illumina  
280 MiSeq platform using 2x300bp reagent kit (Miseq reagent kit v3; Illumina Inc.) for paired-end  
281 sequencing. The sequencing quality control was done with on-board Miseq Control Software and  
282 Miseq Reporter (Illumina Inc.) and the obtained sequences were de-multiplexed, quality-filtered,  
283 clustered and analyzed using QIIME software package (34, 35, 38, 39). Taxonomy classification  
284 was performed within QIIME based on 97% sequence similarity to the Greengenes database  
285 (38). Alpha-diversity and bacterial proportions were compared using Kruskal-Wallis test  
286 followed by pair-wise Mann-Whitney test. Linear discriminatory analysis (LDA) effect size  
287 (LEfSe) was applied to identify discriminative features (unique bacterial taxa) that drive  
288 differences at different time-points or in different groups (40). Hierarchical clustering and heat-  
289 maps depicting the patterns of abundance were constructed within ‘R’ statistical software  
290 package (version 3.6.0; <https://www.r-project.org/>) using the ‘heatmap.2’ and “ggplots”  
291 packages.

292

293 **Statistical analysis.** All statistical analyses were performed using GraphPad Prism 8.0  
294 (GraphPad Software, Inc., San Diego, CA). Unless otherwise specified, differences were  
295 determined using the Mann-Whitney *U* test (comparing two groups) or the Kruskal-Wallis test  
296 with Dunn's post-analysis (comparing multiple groups).

297

## 298 **Results.**

299

300 **Establishing *Klebsiella pneumoniae* colonization in the murine intestinal tract.** We sought to  
301 establish a GI model of *Klebsiella pneumoniae* colonization that would mimic natural  
302 colonization in a host. Because of the difficulty in establishing *Kpn* GI colonization through  
303 gavage treatment, previous studies used antibiotic pre-treatment to disrupt the host microbiota  
304 and allow for *Kpn* colonization via the gavage method (41-43). We first tested the ability  
305 of *Kpn* to colonize the GI tract by giving adult mice doses ranging from  $10^5$ - $10^9$  CFU/100 $\mu$ l,  
306 without antibiotic treatment so as not to disrupt the host microbiota (**Fig. 1A**). However instead  
307 of a gavage treatment, mice were infected orally by pipette feeding to simulate the natural route  
308 of infection (44). We used a *Kpn* clinical isolate KPPR1S that has been used extensively to  
309 model *Kpn*-associated disease-state in mice. The streptomycin- and rifampin-resistance of  
310 KPPR1S allowed us to enumerate the bacteria in the fecal pellets on selective plates. As  
311 observed in **Fig. 1B-C**, *Kpn* colonized the GI tract and was shed robustly in the feces of mice  
312 with doses above  $10^5$  CFU. A dose  $< 10^5$  CFU did not result in the establishment of colonization  
313 (Threshold for detection 100 CFU), suggesting a minimum dose of  $10^5$  is required (Data not  
314 shown). Based upon these results, we chose  $10^6$  CFU, as the minimum dose required to  
315 establish *Kpn* colonization. Based on our preliminary studies that suggest poor *Kpn* fecal  
316 shedding correlates with reduced GI colonization, we used daily fecal shedding as a substitute  
317 for colonization density in the GI tract. Next, we determined how long *Kpn* colonizes the mouse  
318 GI tract. We followed *Kpn* shedding in feces of infected mice for either 15 or 30 days p.i and  
319 observed that *Kpn* was shed at similar levels throughout the study (**Fig. 1D-E**). Furthermore, our  
320 results showed that *Kpn* colonizes the mucosal surface of the oropharynx (**Fig. 1F**). Taken  
321 together, our data suggest that, when introduced by the oral route, *Kpn* colonizes the mucosal  
322 surface of the oropharynx, can establish and persist in the GI tract, and is shed robustly in the  
323 feces.

324 A hallmark of *K. pneumoniae* isolates is their genetic heterogeneity, which affects their  
325 ability in causing disease (45). Thus, we determined whether *Kpn* genetic plasticity also  
326 contributes to GI colonization. We tested the ability of a set of genetically diverse clinical *Kpn*  
327 isolates to colonize the GI tract of mice. For analysis we chose MKP103 a derivative of  
328 KPNIH1, which was the cause of an outbreak at NIH Clinical Center, hvKP1, a hypervirulent  
329 human isolate, and AZ99, a human fecal isolate. All three strains showed varying colonization  
330 density of the murine GI tract, with the hvKP1 shedding at a similar level to KPPR1S (**Fig. 2A**).  
331 Surprisingly, the MKP103 isolate colonized poorly, with mice generally clearing it from their GI  
332 tract by day 5 p.i. As observed through fecal shedding, the human fecal isolate AZ99 consistently  
333 colonized the GI tract albeit at a lower density in comparison to KPPR1S. Moreover, mice  
334 colonized with hvKP1 had a high mortality rate (**Fig. 2C**). Hypervirulent isolates are notorious  
335 for causing pyogenic liver abscesses (PLA) (11). As shown in **Fig. 2D** mice that succumbed after  
336 oral inoculation with the hvKP1 isolate, were colonized at a high density in the liver, kidney and  
337 spleen with the same isolate. Moreover, these mice appeared to have developed liver abscesses  
338 (**Fig. 3A**), which H&E and Gram staining confirmed to contain necrotic tissue, inflammatory  
339 cells, and gram negative bacteria (**Fig. 3B-D**). Thus, our model mimics human disease dynamics,  
340 where a hypervirulent isolate (hvKP1) is able to translocate from the GI tract to other sterile  
341 sites, and cause the development of the disease state.

342  
343 **Antibiotic treatment leads to the development of the *Kpn* supershedder phenotype.** Given  
344 that the fecal-oral route of transmission in a hospital setting is considered a significant cause of  
345 nosocomial infections (46, 47) it was surprising that the MKP103 isolate failed to colonize the  
346 GI tract of mice (**Fig. 2A**). However, as many of the patients that acquired MKP103 in the GI  
347 tract were on antibiotics (20), we considered whether the use of antibiotics would affect the  
348 ability of this isolate to colonize the GI tract. Moreover, high use of antibiotics in a health-care  
349 setting correlates with *Klebsiella pneumoniae* infections (20). Therefore mice were gavaged with  
350 neomycin to reduce the colonization resistance by the host GI microbiota, and then infected with  
351 MKP103 to determine whether antibiotic treatment positively affected its ability to colonize. As  
352 shown in **Fig. 2B** antibiotic pre-treatment of mice allowed MKP103 to colonize and persist  
353 within the infected host GI tract up to 15 days post-infection.

354 Our results show that antibiotic treatment allows *Kpn* isolate (MKP103) that colonizes  
355 poorly to establish itself in the GI tract. However, whether antibiotic treatment affects  
356 colonization density of isolates that colonize robustly without requiring antibiotic treatment  
357 remains unknown. We determined whether treatment with antibiotics would lead to the  
358 development of a supershedder phenotype, in which an infected host sheds the pathogen at a  
359 much higher number than other infected host. This phenomenon has been observed in the natural  
360 setting and is considered a major source of host-to-host transmission (48). Murine models have  
361 been used to characterize this phenotype, where  $>10^8$  CFU/g (supershedder [SS] threshold) of the  
362 indicated pathogen in the feces is generally considered as the threshold for the supershedder  
363 phenotype (SS phenotype) (25, 26). Using the KPPR1S isolate, as it consistently colonized mice  
364 at a high density without antibiotic treatment, we assessed fecal shedding of *Kpn* for 10-12 days  
365 p.i. after either a single streptomycin treatment or three consecutive days of streptomycin  
366 treatment. We found that antibiotic treatment triggered a temporary supershedder phenotype  
367 (**Fig. 4A-B**), whereas, no such phenotype was observed with the vehicle only control (PBS) (**Fig.**  
368 **S1A**). A second treatment of antibiotics, after mice had returned to baseline levels of *Kpn*  
369 shedding from the first antibiotic treatment, caused the development of another transient  
370 supershedder phenotype (**Fig. S1B**).

371 In a clinical setting, immunocompromised patients tend to be on continuous antibiotic  
372 treatment; therefore, we determined the effect of daily antibiotic treatment on *Kpn* shedding. We  
373 supplemented the drinking water of mice with ampicillin 24 hours before *Kpn* inoculation and  
374 continued for 10 days p.i. As *Kpn* is intrinsically resistant to ampicillin, the mice infected with  
375 MKP103 isolate displayed the *Kpn* supershedder phenotype (**Fig. 4C**). After removal of  
376 antibiotic pressure, the mice displayed the high shedding phenotype for multiple days. Taken  
377 together, our data suggest that, as a consequence of antibiotic treatment, *Kpn* can develop a  
378 supershedder phenotype and the length of this phenotype is dependent upon the duration of the  
379 antibiotic treatment.

380

381 **Antibiotic treatment leads to the disruption of host-microbiota that correlates with the**  
382 **supershedder phenotype.** Next, we determined whether *Kpn* infection or antibiotic treatment  
383 induced supershedder phenotype is a result of the displacement of the host microbiota. To  
384 provide insight into the *Kpn* carrier state and the supershedder phenotype, we carried out a 16S

385 analysis to determine the host intestinal microbiota changes that occurred during infection and as  
386 a consequence of antibiotic treatment (**Fig. 5A**). For a detailed 16S analysis, we isolated DNA  
387 from fecal samples collected at six different time points from *Kpn* infected mice (n=4). Fecal  
388 pellets were collected pre-inoculation to determine the baseline of the host GI microbiota.  
389 Samples were collected on days 7, 9 and 11 post-antibiotic treatment to determine changes in the  
390 host microbiota. At days 3 and 5 p.i, we were unable to detect *Kpn* 16S *rRNA* gene sequences,  
391 even though it shed at  $10^6$  CFU / Gram of fecal sample. This result suggests that *Kpn* comprises  
392 only a minor component of the host intestinal microbiota. The main component of a diverse  
393 microbial community of the host intestine included *Bacteroidetes* (*Bacteroidales* [S24-7]) and  
394 *Firmicutes* (*Clostridiales*) (**Fig. 5C; Table. S1**), which are considered to be a typical profile for  
395 stable mammalian intestinal microbiota.

396 A single treatment with str led to dramatic changes in the intestinal microbiota. As  
397 detailed in **Fig. 5B**, there was a statistically significant decline in the total species richness,  
398 especially in S24-7, with a concurrent increase in *Erwinia* and *Bacteroides*. As illustrated in **Fig.**  
399 **5C**, we only observed *Kpn*-specific 16s rRNA gene sequences during the antibiotic-induced  
400 supershedder phenotype. A decrease in *Kpn* shedding levels correlated with an increase in S24-7  
401 and other major components of the host microbiota, and a loss of detection of *Kpn* specific 16s  
402 rRNA sequences. Thus, antibiotic treatment leads to a disruption of host-microbiota that  
403 correlates with the development of temporary supershedder phenotype. Moreover, disruption of  
404 the host microbiota with antibiotics is associated with reduced microbial richness, which  
405 recovers three days post-antibiotic exposure.

406  
407 ***Klebsiella pneumoniae* factors contributing to shedding and colonization.** To examine the  
408 contribution of known virulence determinants of *Kpn*, we tested shedding and colonization of the  
409 previously described capsule (*cps*)-deficient mutant ( $\Delta$ *manC*) of the strain KPPR1S. As is  
410 evident from **Fig. 6A**, over the course of 15 days of infection, the  $\Delta$ *manC* mutant shed and also  
411 colonized poorly (**Fig. S2**) in comparison to the parental wild-type (WT) strain.

412 Bacteria can form biofilm like structures in the GI tract (49). We hypothesized that a  
413 coinfection with WT *Kpn* and the  $\Delta$ *manC* strain would form a mixed population (intraspecies)  
414 biofilm in the GI tract, helping compensate for the capsule deficiency of the  $\Delta$ *manC* strain.  
415 However, coinfecting mice still shed the  $\Delta$ *manC* strain poorly compared to the parental strain

416 **(Fig. 6B)**. These observations suggest that capsular polysaccharide of *Kpn* is essential for robust  
417 GI colonization and eventual fecal shedding.

418 Next, as the type 1 fimbriae of *Kpn* is considered essential for colonization of the host  
419 urinary tract, we determined its role in GI colonization (31). The KPPR1S *fim* locus promoter is  
420 under phase variable control, which was observed to be in the off position under both *in vitro*  
421 (broth culture) and *in vivo* (fecal pellets) (data not shown). To determine the requirement of type  
422 1 fimbriae of KPPR1S in GI colonization, a deletion mutant of *fimH* that encodes the type 1  
423 fimbriae tip adhesin, required for proper interaction with the host epithelial layer (50) was  
424 constructed. As is evident from **Fig. 6C-D**, even though mice infected with the *fimH*- mutant had  
425 reduced median shedding, it was not significantly lower than the WT strain. Lastly, we  
426 determined whether these mutants also contribute towards colonization of the mucosal surface of  
427 the oropharynx. **Fig. 6E** shows, capsule was essential for colonization of the oropharyngeal  
428 space, whereas type 1 fimbriae was dispensable. Overall our data indicate that *Kpn* capsular  
429 polysaccharide plays a critical role in GI colonization. In contrast, *Kpn* type1 fimbriae appears to  
430 be nonessential for gut colonization.

431

432 ***Klebsiella pneumoniae* transmission occurs through the fecal-oral route.** Transmission of  
433 enteric pathogens generally occurs through the fecal-oral route, and host-to-host transmission in  
434 a hospital setting is a major source of infection (20, 46). Thus, we determined whether *Kpn* host-  
435 to-host transmission events could be observed in our animal model. Initially, we housed one  
436 uninfected mouse (contact) with four infected mice (index). Fecal pellets were collected to  
437 enumerate colonization density and whether transmission from index to contact mice occurred.  
438 We observed 100% transmission efficiency with a ratio of 4:1, with transmission occurring  
439 within 24 hours of cohousing the animals (**Fig. 7A and C**). Since transmission efficiency is high  
440 with a ratio of 4:1, we decided to determine *Kpn* transmission dynamics with one index mouse  
441 cohoused with four contact mice. With a ratio of 1:4 reduced transmission efficiency (~35%)  
442 was observed, suggesting that not enough *Kpn* shedding events occurred for all uninfected mice  
443 to become colonized (**Fig. 7B-C**).

444 Next, to mimic conditions prevalent in a hospital, where patients tend to be on antibiotics,  
445 we investigated the effects of antibiotic treatment on *Kpn* transmission dynamics. A single  
446 antibiotic treatment to the index mouse cohoused with four contact mouse led to >90%

447 transmission, suggesting that high *Kpn* shedding in the fecal pellets can overcome colonization  
448 resistance of the contact mice (**Fig. 7C**). Lastly, we tested the effect of antibiotics on both index  
449 and contact mice by adding antibiotics in their drinking water. An index mouse was infected with  
450 MKP103 and was housed separately for several days before being introduced to four contact  
451 mice already on antibiotics. We observed 100% transmission efficiency when both index and  
452 contact mice were on daily antibiotics. Moreover, as all the mice in the cage were on antibiotics,  
453 they all developed the supershedder phenotype (**Fig. S3A**). Our results provide insight into the  
454 high transmissibility of *Kpn* in hospitals where there is high antibiotic usage.

455 We hypothesize that *Kpn* transmission occurs through the fecal-oral route, based upon  
456 transmission models of other enteric pathogens and the coprophagic nature of mice. However, as  
457 *Kpn* colonizes both the oral cavity and the GI tract, we determined whether host-to-host  
458 transmission of *Kpn* is due to the coprophagic action of mice or by contact with infected oral  
459 secretions. Mice were housed in a metabolic cage, where they do not have access to their fecal  
460 pellets. At a 4:1 ratio of the index to contact mice, no transmission events were detected between  
461 the infected and the uninfected mice during the 10-day experiment, suggesting that in our animal  
462 model, host-to-host transmission requires the contact with fecal matter (**Fig. 7C**). Lastly, the  
463 infected mice in the metabolic cage shed *Kpn* robustly suggesting persistent colonization that did  
464 not require re-seeding through the consumption of infected fecal pellets (**Fig. S3B**).

465

## 466 **Discussion**

467 The genetic heterogeneity of *Klebsiella pneumoniae* allows this pathogen to colonize a  
468 variety of host mucosal surfaces, which can dramatically impact the clinical outcome. *Klebsiella*  
469 *pneumoniae* disease manifestations in the respiratory and urinary tract have been extensively  
470 modeled in animals (4). However, the gastrointestinal mucosal surface, also colonized readily by  
471 *Kpn* has not been the focus of many scientific studies (51, 52). In this report, we describe a  
472 murine model of oral infection of *K. pneumoniae* to study GI colonization and host-to-host  
473 transmission. We demonstrate for the first time that *Kpn* can stably colonize the GI tract of  
474 immunocompetent mice without disrupting the host-microbiota - a key strength of our model.  
475 Secondly, a host colonized persistently with a pathogen is considered a significant reservoir for  
476 new infections, and our animal model of *Kpn* GI colonization replicates this phenotype,  
477 indicating it is a useful tool to study within-host events and host-to-host transmission. Third, we

478 observed variability in the ability to colonize the GI tract and to cause invasive disease between  
479 different *Kpn* isolates, suggesting *Kpn* genetic plasticity might be involved in the observed  
480 variability. Lastly, as many patients in a hospital setting tend to be on antibiotics, we were able to  
481 show experimentally for the first time that antibiotic treatment triggers the development of the  
482 supershedder phenotype in carrier mice, which promotes host-to-host transmission.

483 Previous studies used antibiotic treatment to reduce host colonization resistance by  
484 disrupting the resident microbiota to establish *Kpn* colonization (31, 41, 53). However, treatment  
485 with antibiotics reduces the ability to discern the role of bacterial factors that allow *Kpn* to  
486 overcome colonization resistance. Our model does not require the use of antibiotics to establish  
487 stable and persistent *Kpn* colonization, and therefore allows for the identification of bacterial and  
488 host factors that contribute to *Kpn* colonization and transmission. In our initial studies, we  
489 established that the route of infection is critical for stable colonization of *Kpn* in the GI tract.  
490 Oral gavage, a standard mode of infection for modeling enteric infections in murine models, only  
491 led to transient *Kpn* colonization in the GI tract (data not shown). However, by orally feeding a  
492 similar dose allowed *Kpn* to colonize the GI tract and persist without disrupting the host  
493 microbiota. A recent study by Atarashi *et al.* showed that *Kpn* colonizing the oral cavity of  
494 patients can seed the GI tract (44). In our model of infection we also observed *Kpn* colonizing  
495 the murine oral cavity.

496 A hallmark of many GI pathogens is their ability to cause an acute host inflammatory  
497 response. Multiple reports also suggest that *Kpn* might contribute towards gut dysbiosis and play  
498 an active role in inducing host response (44, 54). However, epidemiological data also suggest  
499 that *Kpn* can silently colonize healthy individuals (18). In our murine model, we were unable to  
500 detect any acute signs of inflammation post-*Kpn* infection. Furthermore, unlike the *Salmonella*  
501 serovar *Typhimurium* supershedder phenotype, the *Kpn* antibiotic-induced supershedder  
502 phenotype was not associated with colitis (**Fig. S4**). Our data suggest that *Kpn* in the GI tract  
503 behaves in a manner that does not elicit an acute inflammatory response and carriage is  
504 considered an asymptomatic event.

505 The role of major virulence factors of *Kpn*, including its capsular polysaccharide (CPS),  
506 type 1 fimbriae, and others have been extensively examined under both *in vitro* and *in vivo*  
507 conditions (4). However, data for the requirement of *Kpn* CPS in GI colonization appears  
508 contradictory (41, 42). As those studies were undertaken in mice treated with antibiotics, it is



509 possible that the exact role of the bacterial factors is probably masked. Herein, using our model,  
510 we show definitively that CPS of *Kpn* is an essential component required for efficient  
511 colonization of both the upper (oropharynx) and lower (intestinal) GI tract. The role of the  
512 capsule possibly pertains to protection against host-mediated clearance and interactions with  
513 mucus (42, 55, 56).

514 We also tested the requirement of the *Kpn* type 1 fimbriae in GI colonization. Even  
515 though the type 1 fimbriae is critical for colonization of the urinary tract, it appears to be  
516 dispensable for GI colonization (31). However, with certain pathogenic *E. coli* isolates, type 1  
517 fimbriae is required for colonization (57, 58). Furthermore, recent work by Jung *et al.* using  
518 antibiotic-treated mice observed a defect in GI colonization with a *Kpn fimD* mutant that is  
519 missing the usher constituent that facilitates assembly and eventual translocation of the pilus  
520 across the outer membrane (53). However, in our model we only observed a slight reduction in  
521 median shedding from mice infected with the *fimH* isogenic mutant compared to the WT strain,  
522 suggesting that the expression of the type 1 fimbriae of the KPPR1S isolate is dispensable for GI  
523 colonization. This result that the type 1 fimbriae of KPPR1S isolate does not contribute towards  
524 GI colonization was not unexpected, as we did not observe its expression under the conditions  
525 tested (Data not shown). However, type 1 fimbriae might play a role in GI colonization for  
526 isolates that do express the structure.

527 Our model also allows us, for the first time, to understand the transmission dynamics  
528 of *Klebsiella pneumoniae*. We observed transmission events between *Kpn*-infected and contact  
529 mice, suggesting that *Kpn* shedding in this model is high enough to permit transmission, albeit at  
530 a lower frequency. We also observed that the contact mice colonized at a lower density  
531 compared to the index mice, possibly because of the reduced *Kpn* dose in the fecal pellets. Thus,  
532 our data follows epidemiologic studies that suggest 5-25% carriage rates in the natural  
533 environment (19, 59). However, the treatment of either infected or contact mice with antibiotics  
534 led to a high host-to-host transmission frequency. A single dose of antibiotic treatment  
535 established a suppershedder phenotype in the index host, which was able to transmit to >90% of  
536 uninfected mice. It is suggested that 80% of the infections are due to 20% of infected individuals  
537 transmitting to uninfected hosts (known as the 80/20 rule) (60). Such individuals are termed as  
538 supershedders or superspreaders. However, we were unable to observe a *Kpn* suppershedder  
539 phenotype without disrupting the host microbiota, suggesting that in our animal

540 model, *Kpn* transmission dynamics do not follow the 80//20 rule. Multiple studies on enteric  
541 pathogens show that antibiotic treatment causes a dysbiosis in the GI tract, reduces colonization  
542 resistance by the stable resident microbiota, and promotes the expansion of pathogens (25, 26).  
543 Our 16S analysis shows that the antibiotic-based supershedder phenotype correlates with a  
544 reduction in microbial diversity. In contrast to *Salmonella* serovar *Typhimurium* and *Clostridium*  
545 *difficile* supershedder phenotypes (25, 26), the *Kpn* supershedder phenotype lasts for a shorter  
546 duration following a single antibiotic treatment. However, *Kpn* infected mice on continuous  
547 antibiotics shed at supershedder levels, a condition we believe to be common in a hospital  
548 setting. Our data suggest that the development of the supershedder phenotype is the main  
549 contributor to host-to-host transmission events in a hospital. The transmission frequency of *K.*  
550 *pneumoniae* has not been established in a hospital setting and may be higher or lower than the  
551 rates determined in our murine model. We believe that a setting with high antibiotic use  
552 increases the likelihood of *Kpn* outbreaks. Therefore, patients on antibiotics should be carefully  
553 monitored to determine if they are colonized with *K. pneumoniae*.

554 In conclusion, we have described a model that will be useful in understanding complex  
555 interactions between *K. pneumoniae* and the host immune system and the intestinal microbiota.  
556 The availability of an arrayed marked mutant library of *Kpn* (32) and several  
557 annotated *Kpn* genomes should allow for studies identifying bacterial factors that contribute  
558 towards *Kpn* colonization and transmission. Since a majority of *Kpn* nosocomial infections arise  
559 from GI colonization and fecal-oral route of transmission (20, 29), an understanding of the  
560 biology of *Kpn* gastrointestinal colonization and fecal-oral transmission would be valuable as it  
561 could serve as an ideal point of intervention.

562

## 563 **Acknowledgements**

564 We would like to thank Drs. Michael Bachman (University of Michigan), Alan Hauser  
565 (Northwestern University), Virginia Miller (UNC Chapel Hill), Thomas Russo (University of  
566 Buffalo-SUNY) and Jeffery N. Weiser (NYU School of Medicine) for the strains used in this  
567 study. We would also like to thank Drs. Phillip Hernandez (Boston University), Virginia Miller,  
568 Kimberly Walker (UNC Chapel Hill), Jeffrey N. Weiser and Tonia Zangari (NYU School of  
569 Medicine) for fruitful discussions in regards to the establishment of the model and the  
570 manuscript.

571 This study was funded by startup funds provided by Wake Forest Baptist Medical Center to  
572 M.A.Z.

573

574

575 **Figures:**

576 **Figure 1.** *K. pneumoniae* colonizes the gastro-intestinal tract of mice. (A) A schematic  
577 representation of C57BL/6J mice orally infected with *K. pneumoniae* KPPR1S isolate ( $10^5$ ,  $10^6$ ,  
578  $10^8$  and  $10^9$  CFU). (B-C) shows quantified daily shedding results and colonization density in the  
579 intestinal tract (ileum, cecum and colon) at day 7 post-inoculation from mice given different *Kpn*  
580 doses. (D-E) Fecal shedding data collected from mice given  $10^6$  CFU of KPPR1S and followed  
581 for up to either 15 days or 30 days post-infection. (F) (i, ii) Colonization density of KPPR1S  
582 isolate in the oropharynx and lower GI tract of mice 15 days post-inoculation. Bars indicate the  
583 median values. L.O.D, limit of detection.

584

585 **Figure 2.** Differences among *K. pneumoniae* clinical isolates in fecal shedding levels and  
586 virulence. (A.) Mice were infected with the indicated *K. pneumoniae* isolate with daily shedding  
587 values shown. (B.) Comparison between mice infected with *K. pneumoniae* strain MKP103 with  
588 or without pre-treatment of antibiotic neomycin (5 mg/ 200  $\mu$ l). Symbols represent shedding  
589 values obtained from a single mouse on a given day. The bar represents the median value.  
590 Dashed line represents the limit of detect (L.O.D). (C.) Survival of mice infected gastro-  
591 intestinally with *K. pneumoniae* isolate KPPR1S (n=10) or hvKP1 (n=10) over 15 days. An in  
592 extremis state or death was scored as non-survival. Log-rank (Mantel-Cox) test performed to  
593 determine statistical differences. \*\*,  $P < 0.01$  for KPPR1S compared to hvKP1. (D.) Bar graph  
594 showing mean colonization density of hypervirulent isolate hvKP1 in the kidney, liver and  
595 spleen from mice that were initially infected orally with S.E.M bars. Each data point represents  
596 colonization density in a specific organ from a specific mouse. Organs were harvested from mice  
597 that displayed an in extremis state. Limit of detection of liver and kidney was 33 CFU/ml and  
598 100 CFU/ml for spleen.

599

600 **Figure 3.** Representative *K. pneumoniae* liver abscesses (Red Arrows) from mice that  
601 succumbed to infection from hvKP1 isolate that originally colonized their GI tract (A.). Liver  
602 tissue samples stained with hematoxylin and eosin staining. Shown here are liver tissue sample at  
603 20X resolution from either uninfected mice (B.) showing normal heptaocytes or from infected  
604 mice (C.) that contains a large region of coagulative and lytic necrosis with hepatocellular  
605 disassociation including central infiltrates of neutrophils (\*) with few scattered mononuclear  
606 inflammatory cells. The peripheral aspect of the lesion contains numerous lymphocytes,  
607 macrophages and new scattered neutrophils (arrows). (D) 100X oil immersion image of the  
608 boxed area from C showing Gram negative bacteria present within the necrotic liver tissue.

609

610 **Figure 4.** Antibiotic treatment of *K. pneumoniae* infected mice triggers the supershedder  
611 phenotype. Fecal shedding from individual mice (n=9) infected with *K. pneumoniae* KPPR1S  
612 given a single dose of streptomycin sulfate (5 mg/200  $\mu$ l) (A.) or (n=4) given three treatments of  
613 streptomycin on consecutive days (B.), resulted in a rapid development of high shedding ( $>10^8$   
614 CFU / Gram of feces [Supershedder (SS) threshold] lasting for 3 days post antibiotic treatment.  
615 (C.) High fecal shedding of *K. pneumoniae* isolate MKP103 from mice (n=6) given ampicillin  
616 (1g/Liter) in drinking water. Removal of antibiotic pressure begins an eventual shift to reduced  
617 fecal shedding ( $<10^8$  CFU/Gram of feces).

618 **Figure 5.** Antibiotic triggered supershedder phenotype correlates with reduced intestinal  
619 microbial diversity. (A.) Average fecal shedding of *K. pneumoniae* isolate KPPR1S by carrier  
620 mice (n=4) pre antibiotic treatment, and post single dose streptomycin treatment (5 mg/200  $\mu$ l)  
621 that induces a transient supershedder phenotype. Error bars represent S.E.M. Dashed line  
622 represents the supershedder (SS) threshold. (B.) Intestinal microbiota changes in carrier mice  
623 from samples obtained on day 0 pre infection, days 3 and 5 post-inoculation, and days 7, 9 and  
624 11 post-antibiotic treatment. DNA was isolated from fecal samples obtained from infected mice  
625 and 16s rRNA analysis carried out. Data is shown as Shannon diversity index with mean and  
626 *Stdev* values shown. Statistical differences calculated by Kruskal-Wallis test. (C.) Shift in  
627 microbial diversity determined from fecal samples collected on the days indicated above and  
628 shown as bar graph with percent relative abundance of major genera. Arrow shows identification  
629 of *Klebsiella pneumoniae* DNA at Day 7 post-infection. \*, *p* value  $< 0.05$ , \*\*, *p*  $< 0.01$

630 **Figure 6.** The effect of *K. pneumoniae* virulence factors on fecal shedding and oropharyngeal  
631 colonization. (A.) Mice were infected orally with KPPR1S (WT) or with a capsule-deficient  
632 mutant (*AmanC*), and fecal shedding collected on the days indicated. Each symbol represents  
633 CFU obtained from a single mouse on a given day, with solid line representing median values.  
634 (B.) Mice were infected orally with a 1:1 mixture of WT or with capsule-deficient mutant  
635 (*AmanC*) with fecal shedding collected on the days indicated. The CI was determined as  
636 described in the Materials and Methods. Each symbol represents  $\text{Log}_{10}$  CI value from an  
637 individual mouse on a given day. Solid line represents the median. Dashed line indicates a  
638 competitive index of 1, or a 1:1 ratio of mutant to WT. (C.) Mice were infected orally with WT  
639 or with an isogenic mutant (*fimH::cam*; FimH-), and fecal shedding collected on the days  
640 indicated. (D.) Mice were infected orally with a 1:1 mixture of WT or with the mutant (FimH-)  
641 with fecal shedding collected on the days indicated. The CI was determined as mentioned in  
642 Materials and Methods. (E.) The colonization density in the oropharynx for the WT isolate, and  
643 isogenic mutants was determined 15 days post-infection with median values shown. For CI  
644 statistical differences determined by Wilcoxon signed rank test. Mann-Whitney test used to  
645 determine the differences in fecal shedding. Differences in oropharyngeal colonization  
646 determined using Kruskal-Wallis test. \*, *p*  $< 0.05$ , \*\*, *p*  $< 0.01$ , \*\*\*, *p*  $< 0.001$ .

647 **Figure 7.** *K. pneumoniae* transmission between hosts with and without treatment of antibiotics.  
648 (A.) A representative of 4:1 ratio of index to contact transmission. Four naïve mice were infected  
649 orally with KPPR1S, and housed with one uninfected mouse. Fecal shedding was monitored daily

650 from both the index and the contact mouse. **(B.)** A representative of 1:4 ratio of index to contact  
651 transmission. One naïve mouse was infected orally with KPPR1S, and housed with four  
652 uninfected mice and fecal shedding monitored daily **(C.)** Observed efficiency of *K. pneumoniae*  
653 transmission with different infected to uninfected ratios, effect of antibiotics, and transmission  
654 dynamics in a metabolic cage. Statistical differences calculated using two-tailed Fisher's exact  
655 test.

656

## 657 Supplemental Figures.

658 **Figure S1. (A.)** Treatment of *K. pneumoniae* infected mice with PBS alone (200 µl) does not  
659 elicit a supershedder phenotype. **(B.)** Streptomycin sulfate (5 mg/200 µl) treatment triggers the  
660 supershedder phenotype ( $> 10^8$  CFU/Gram of feces) in mice infected with *Klebsiella*  
661 *pneumoniae*. A second treatment of Streptomycin sulfate (5 mg/200 µl) once mice have returned  
662 to reduced *Kpn* shedding elicits a second supershedder phenotype that is also transient.

663 **Figure S2.** The colonization density in the GI tract (Ileum, cecum and colon) for the WT isolate,  
664 and isogenic capsule deficient mutant (*ΔmanC*) was determined 15 days post-infection with  
665 median values shown. Limit of detection was  $10^2$  CFU/Gram of tissue. Differences in GI  
666 colonization determined using Kruskal-Wallis test. \*\*\*,  $p < 0.001$ .

667 **Figure S3. (A.)** Antibiotic treatment leads to development of supershedder phenotype in the  
668 index (Infected) mice and high transmission rates. Index mice were given ampicillin (1g/Liter) in  
669 drinking water a day before oral inoculation with *Kpn* isolate MKP103. One day before the index  
670 mouse was moved in to the contact mice (n=4) cage they were also given ampicillin (1g/Liter) in  
671 drinking water. The contact mice quickly became colonized with MKP103 isolate, and both the  
672 index and contact mice displayed the supershedder phenotype ( $> 10^8$  CFU/Gram of feces).  
673 Shown here are representation of two independent transmission studies. **(B.)** Fecal shedding data  
674 collected from mice given  $10^6$  CFU of KPPR1S housed in a metabolic cage to reduce  
675 coprophagia, and followed for up to either 13 days post-infection. Shown are median values,  
676 where each point represents a single mouse on a given day. Limit of detection (L.O.D) was  $10^2$   
677 CFU/Gram of Feces.

678 **Figure S4.** Colonization by *Klebsiella pneumoniae* shows normal colonic mucosa. Displayed  
679 here are swiss rolls of colonic mucosa stained with hematoxylin and eosin staining. **(A.)** Mice  
680 given PBS alone and tissue prepared 7 days post-treatment. **(B.)** Colon tissue from mice prepared  
681 7 days post 3% DSS daily treatment. Detailed here is the ulceration (long arrows) of the mucosa,  
682 with inflammation expanding the submucosa (\*), and loss and fragmentation of individual  
683 muscle cells (short arrows). **(C.)** Mice infected with KPPR1S and tissue prepared 7 days post-  
684 infection. **(D.)** Mice infected with KPPR1S, given a single-dose of streptomycin (5 mg/ 200 µl)  
685 to trigger supershedder phenotype and tissue prepared two days post antibiotic treatment.  
686 Colonic epithelium of mice appears normal that are infected with KPPR1S and its supershedder  
687 phenotype, and is similar in morphology to the PBS control.

688 **Table S1.** List of bacterial species identified in the mice fecal pellets using 16s rRNA analysis

689

690 Strains used in this study

| Strain | Description                                                                                                                     | Reference or Source |
|--------|---------------------------------------------------------------------------------------------------------------------------------|---------------------|
| AZ10   | <i>K. pneumoniae</i> stool isolate. ST 1322; wzi 372.                                                                           | (29)                |
| AZ99   | Mouse passaged Str <sup>R</sup> derivative of AZ10                                                                              | This Study          |
| AZ17   | KPPR1 serotype 2 <i>K. pneumoniae</i> isolate. Rif <sup>R</sup> derivative of ATCC43816                                         | (61)                |
| AZ55   | KPPR1S; Str <sup>R</sup> derivative of KPPR1. Rif <sup>R</sup> , Str <sup>R</sup>                                               | (62)                |
| AZ56   | <i>ΔmanC</i> (CPS-) mutant of KPPR1S. Rif <sup>R</sup> , Str <sup>R</sup>                                                       | (63)                |
| AZ70   | MKP103. A carbapenemase (KPC-3) deletion derivative of KPNIH1                                                                   | (32)                |
| AZ71   | <i>hvKPI</i> . Hypervirulent <i>K. pneumoniae</i> K-type 2 isolate. Amp <sup>R</sup>                                            | (64)                |
| AZ94   | Apramycin <sup>R</sup> cassette at <i>att::tn7</i> site derivative of AZ17. Apra <sup>R</sup> , Rif <sup>R</sup>                | (65)                |
| AZ63   | AZ55 with pKD46 plasmid for lambda red combination. Rif <sup>R</sup> , Str <sup>R</sup> , Spec <sup>R</sup>                     | This study          |
| AZ101  | Arrayed Library, MKP103 with transposon element in <i>fimH:cam</i> <sup>R</sup>                                                 | (32)                |
| AZ108  | Moved <i>fimH::cam</i> cassette from AZ101 into AZ63, and plasmid cured. Rif <sup>R</sup> , Str <sup>R</sup> , Cam <sup>R</sup> | This Study          |

691 a. Amp<sup>R</sup>, Ampicillin resistant; Apra<sup>R</sup>, Apramycin resistant; Rif<sup>R</sup>, Rifampin resistant; Str<sup>R</sup>,  
 692 Streptomycin resistant; Spec<sup>R</sup>, Spectinomycin resistant; Cam<sup>R</sup>, Chloramphenicol resistant

693

694

695

696

697

698

699

700

701

702

703  
704  
705  
706  
707  
708  
709  
710  
711  
712  
713  
714  
715  
716  
717  
718  
719  
720  
721  
722  
723  
724  
725  
726  
727  
728  
729  
730  
731  
732  
733

734

735 **Figure 1.**

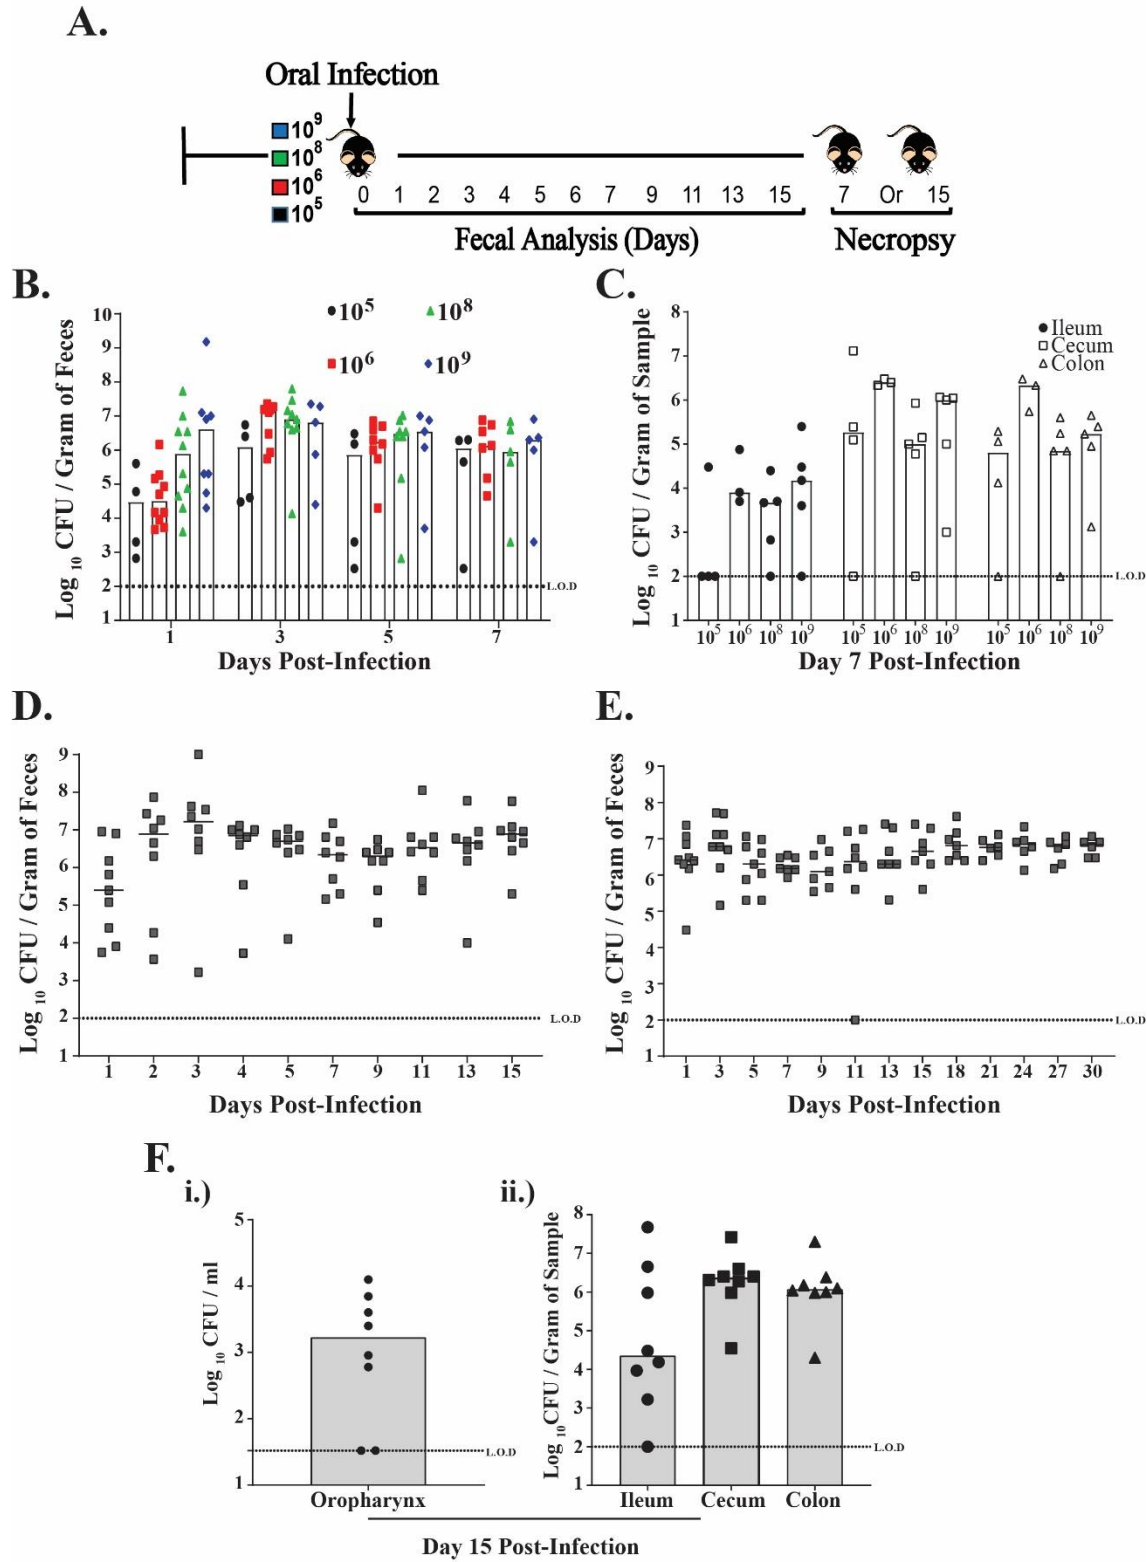

736



737

738 **Figure 2.**

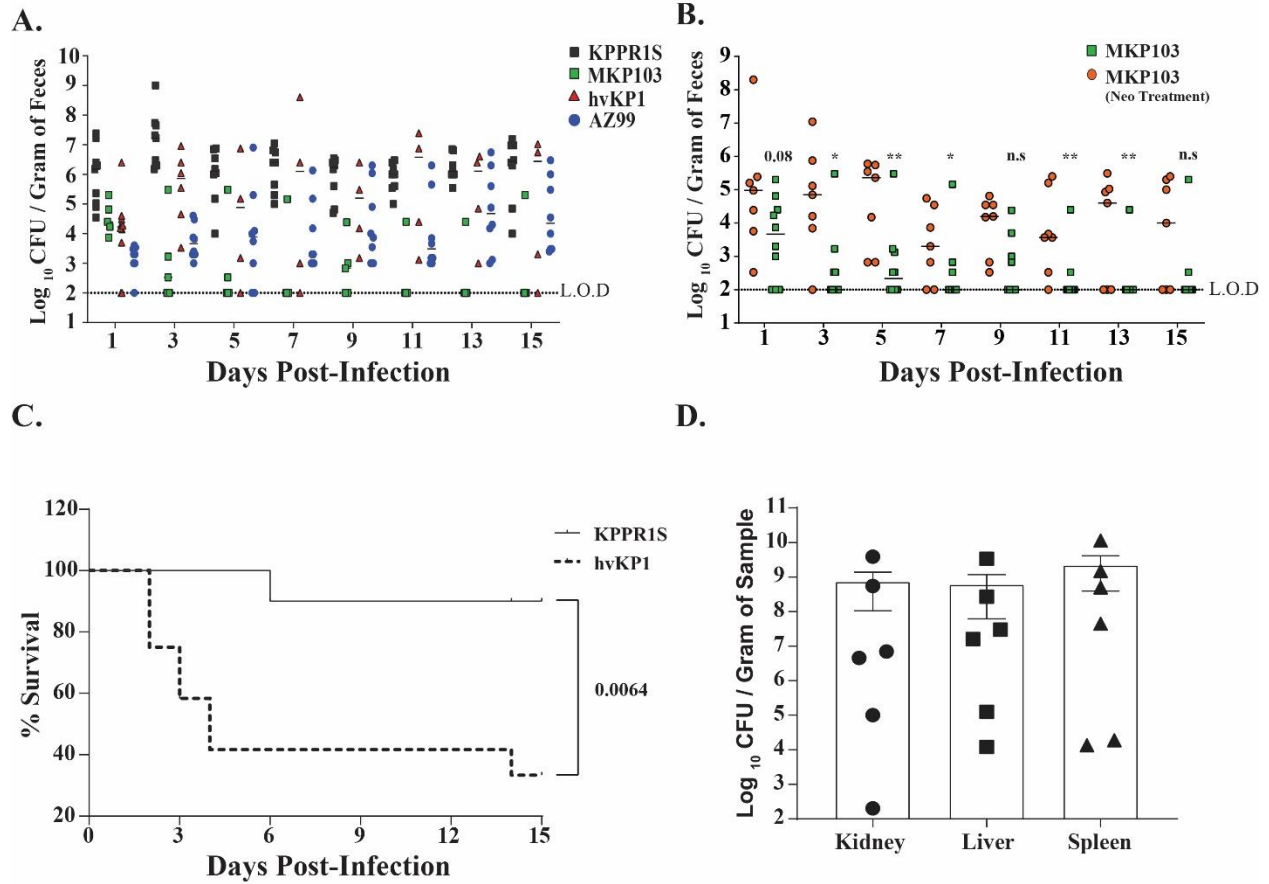

739

740

741

742

743

744

745

746

747

748

749

750

751

752

753

754 **Figure 3.**

**A.**

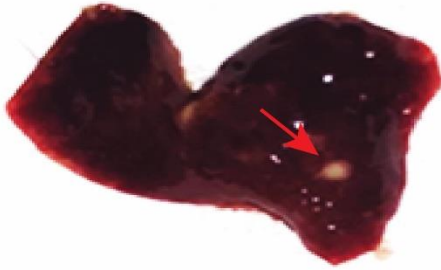

**C.**

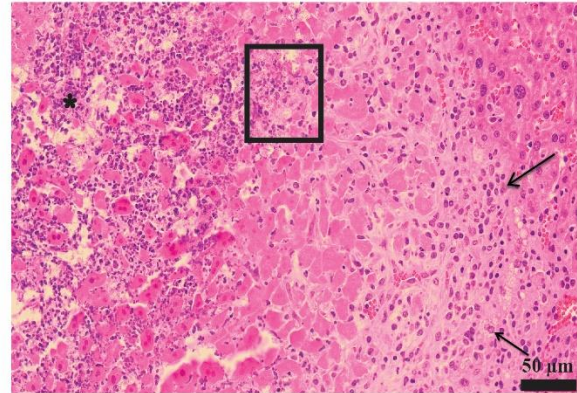

**B.**

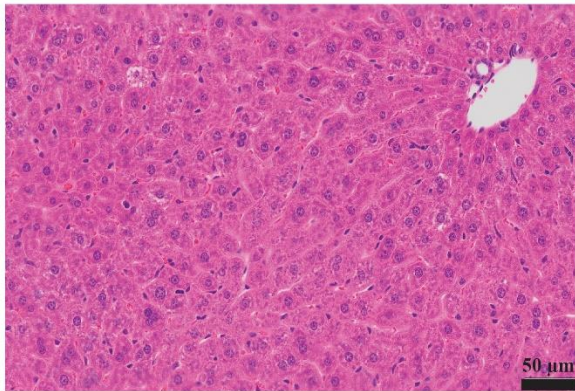

**D.**

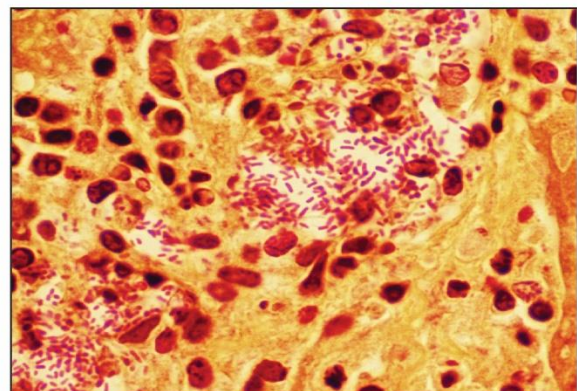

**100X**

755

756

757

758

759

760

761

762

763

764

765

766

767

768

769 **Figure 4.**

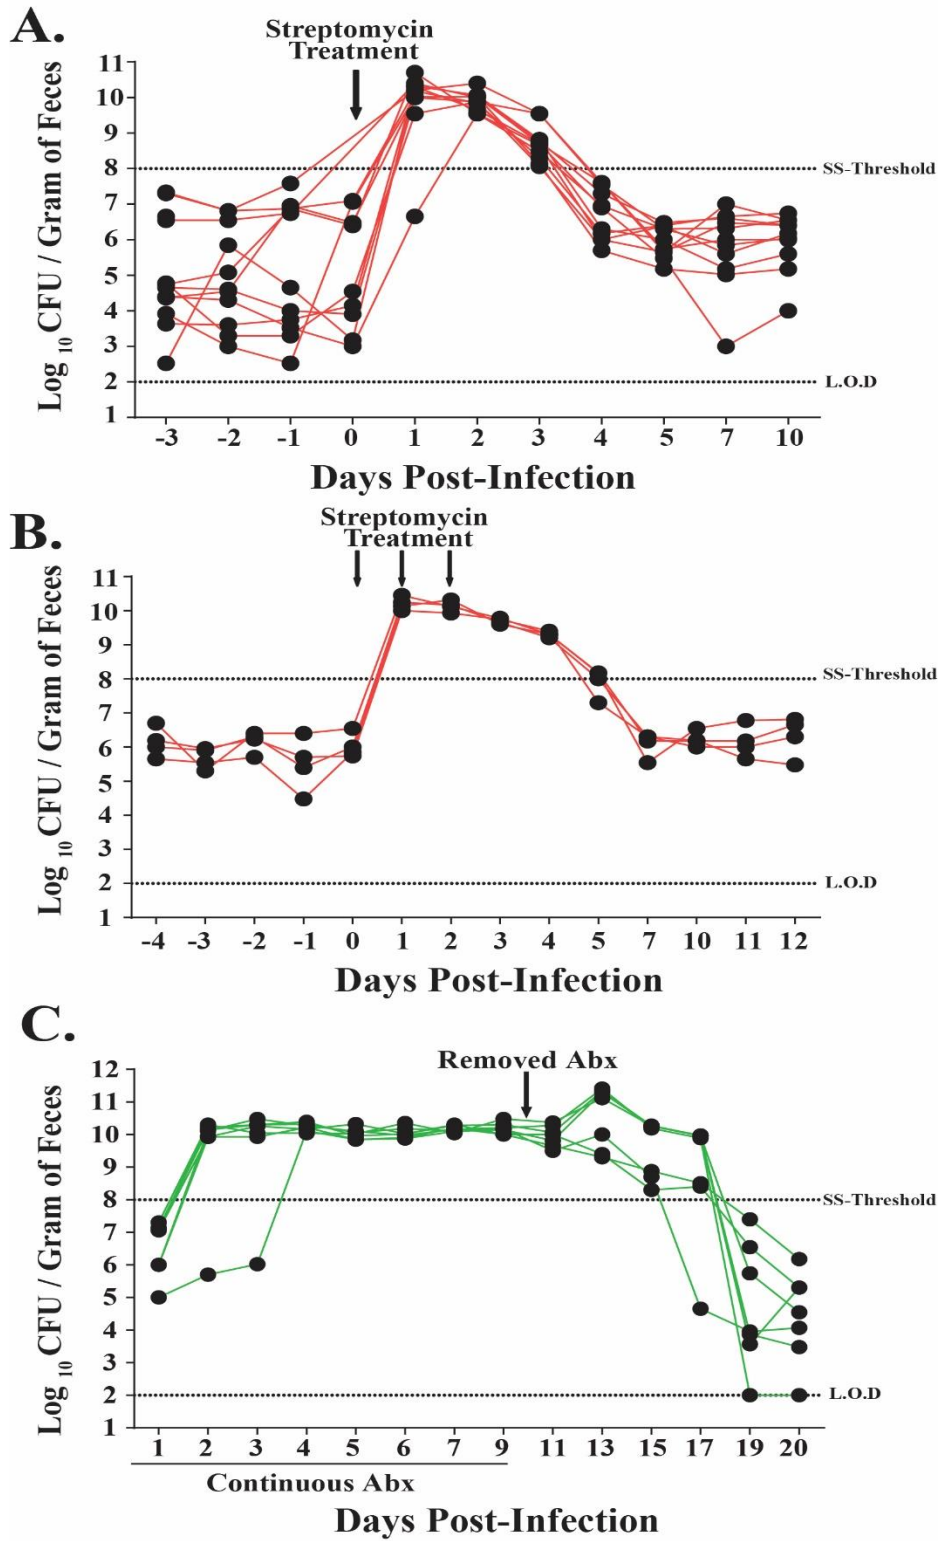

770

771

772

773 **Figure 5.**

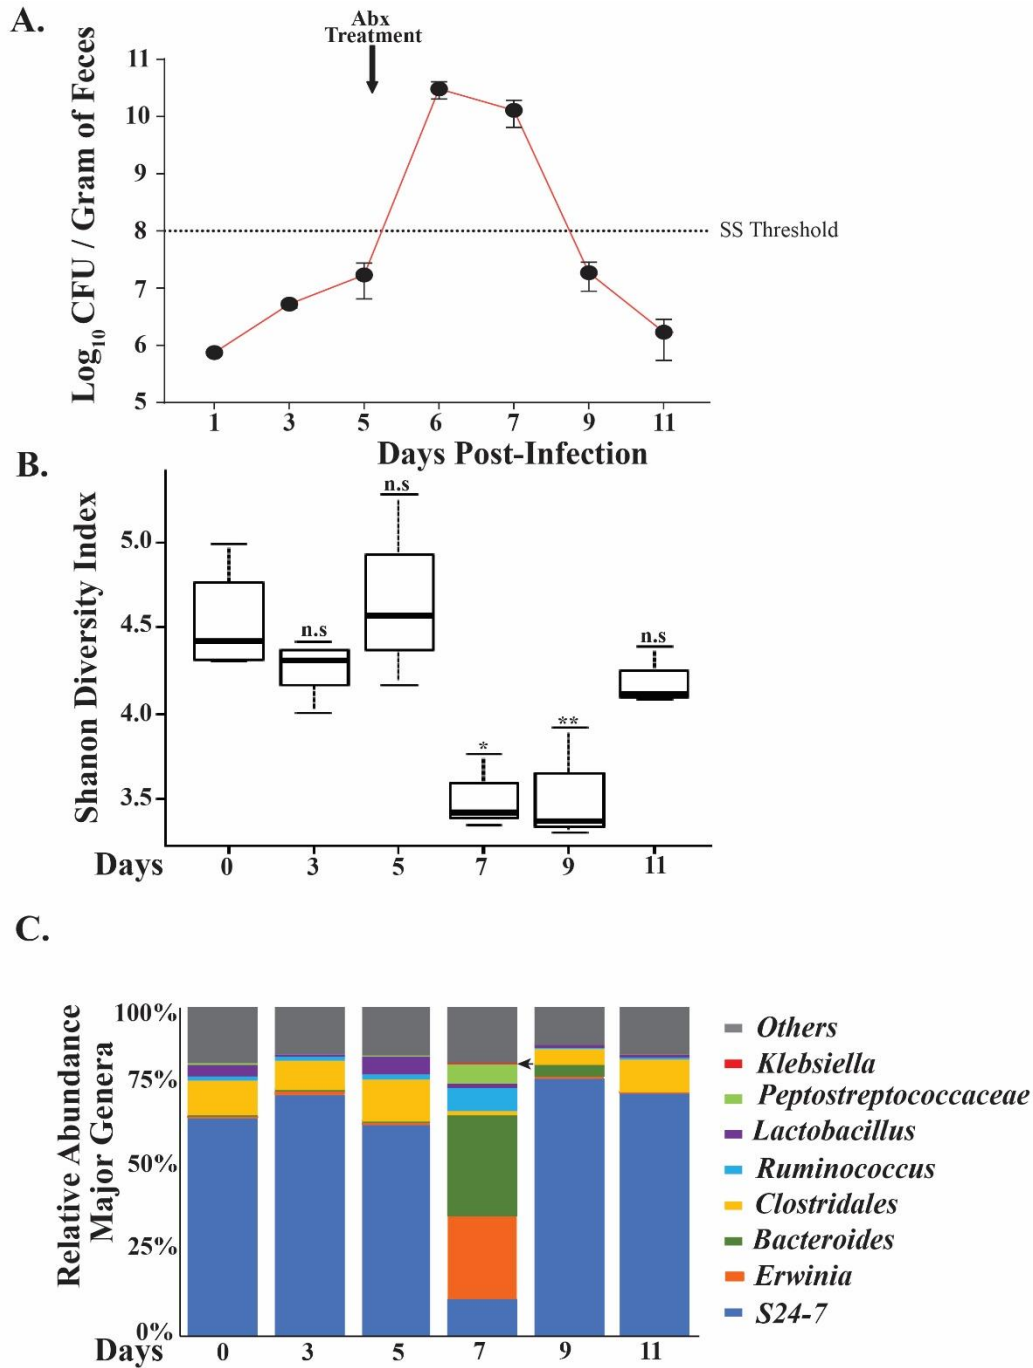

774

775

776

777

778

779

780 **Figure 6.**

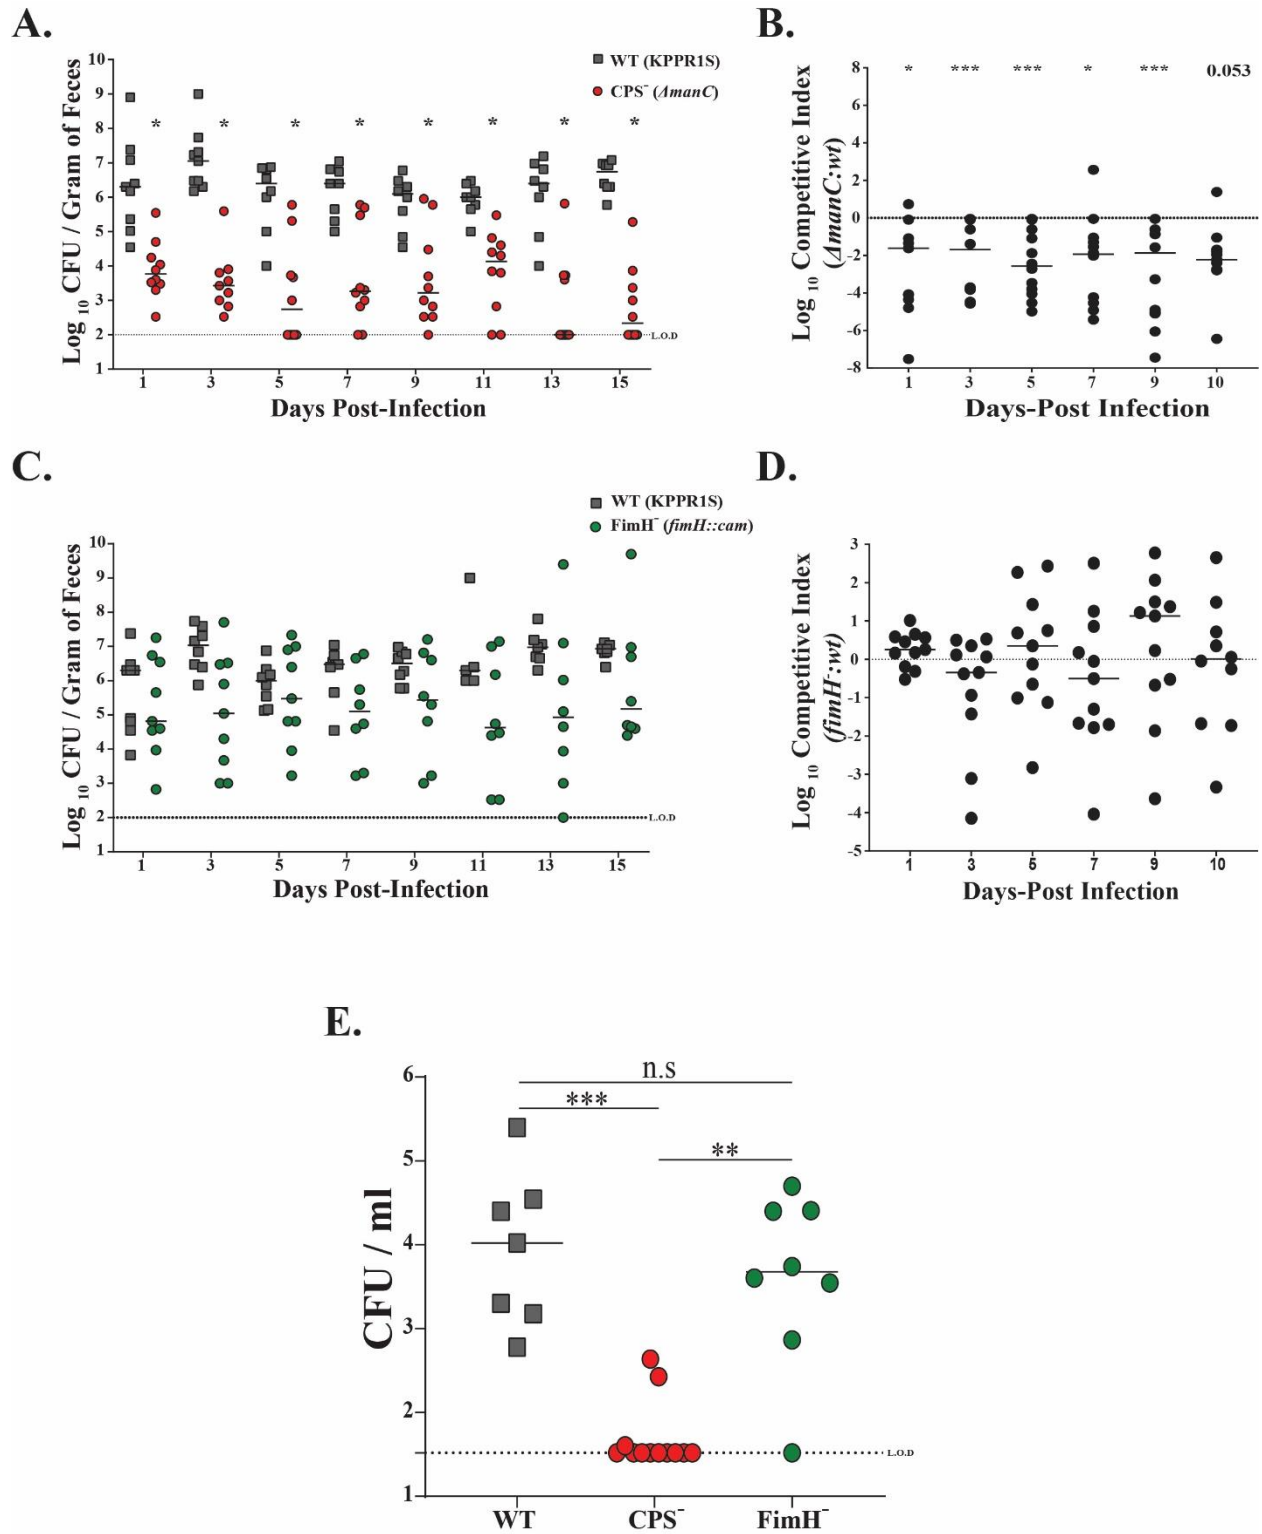

781

782

783

784 **Figure 7.**

**A.**

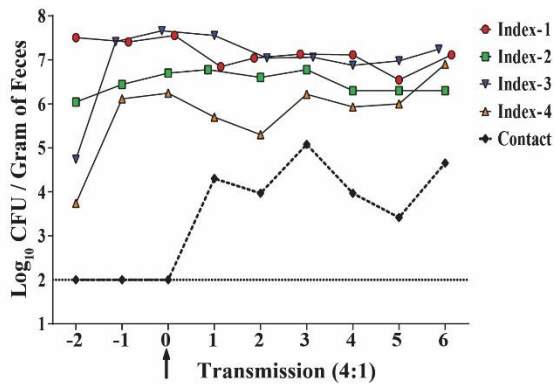

**B.**

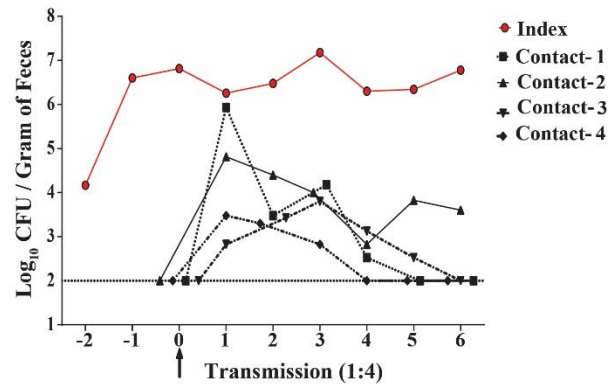

**C.**

| Infected / Uninfected Ratio | Co-housed (Days) | Treatment             | Transmission Frequency (%) | # of Experiments | <i>p. value</i> |
|-----------------------------|------------------|-----------------------|----------------------------|------------------|-----------------|
| 4 : 1                       | 6-7              | None                  | 100                        | 4                | -               |
| 4 : 1                       | 6-10             | Metabolic Cage        | 0                          | 3                | 0.011           |
| 1 : 4                       | 6-7              | None                  | 33                         | 4                | -               |
| 1 : 4                       | 6-7              | Abx Once (Index Only) | 92                         | 3                | -               |
| 1 : 4                       | 6-7              | Abx Daily (Cage)      | 100                        | 3                | -               |

785

786

787

788

789

790

791

792

793

794

795

796

797

798

799

800 **Supplemental Figure 1.**

**A.**

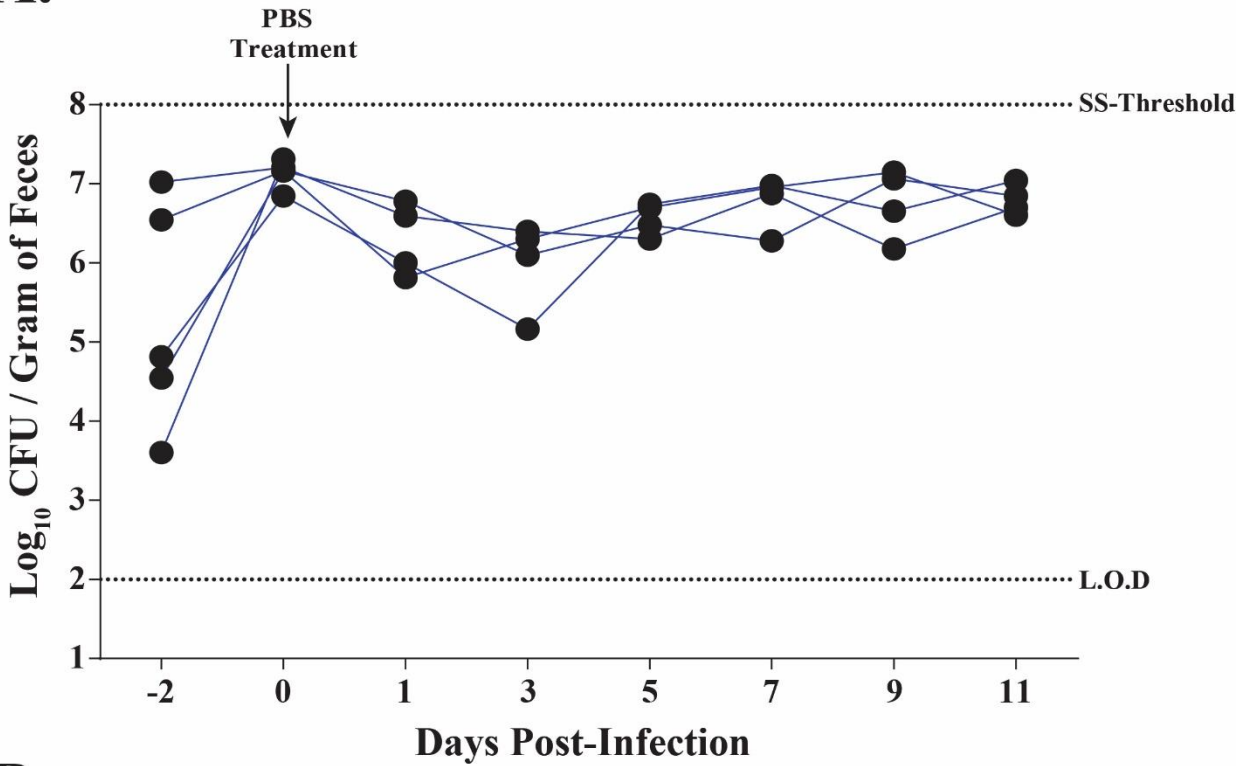

**B.**

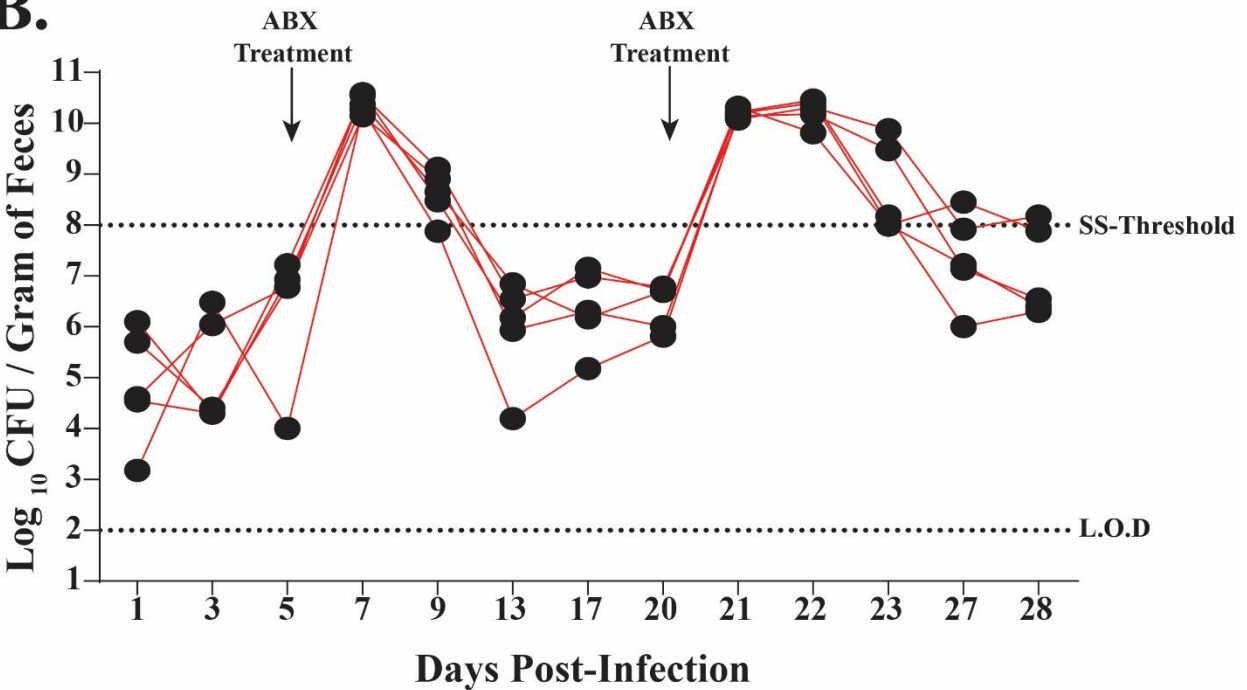

801

802

803

804 **Supplemental Figure 2.**

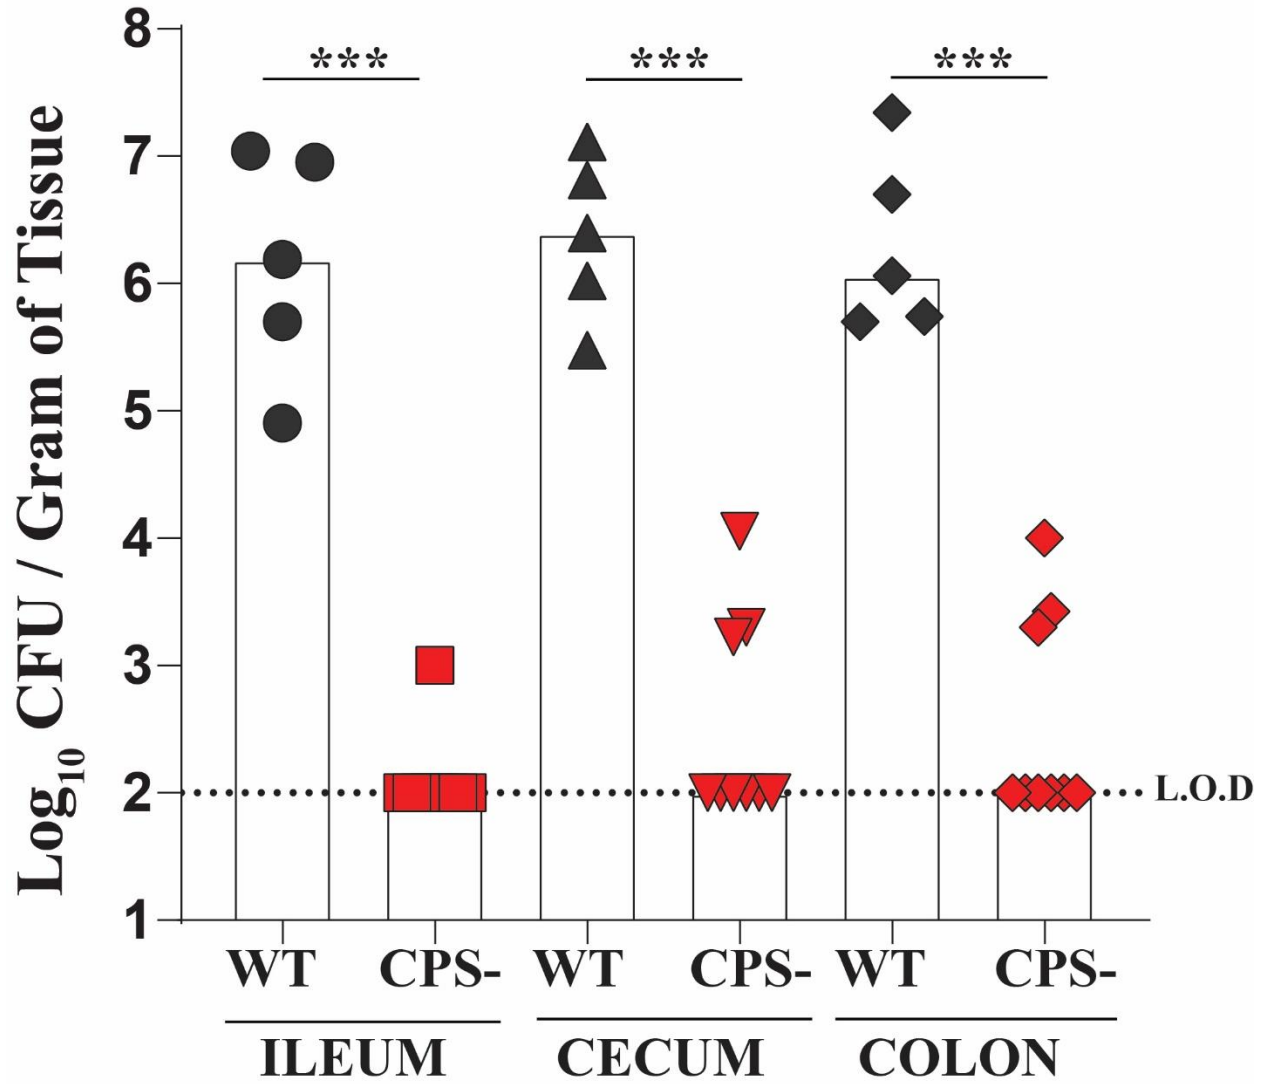

805

806

807

808

809

810

811

812

813

814



815

816 **Supplemental Figure 3.**

**A.**

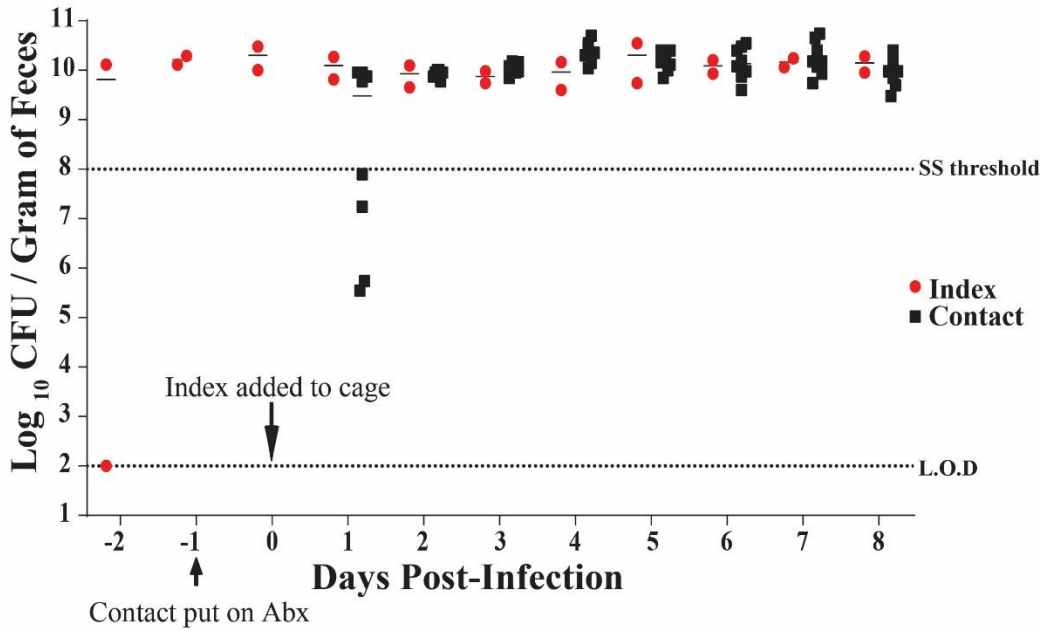

**B.**

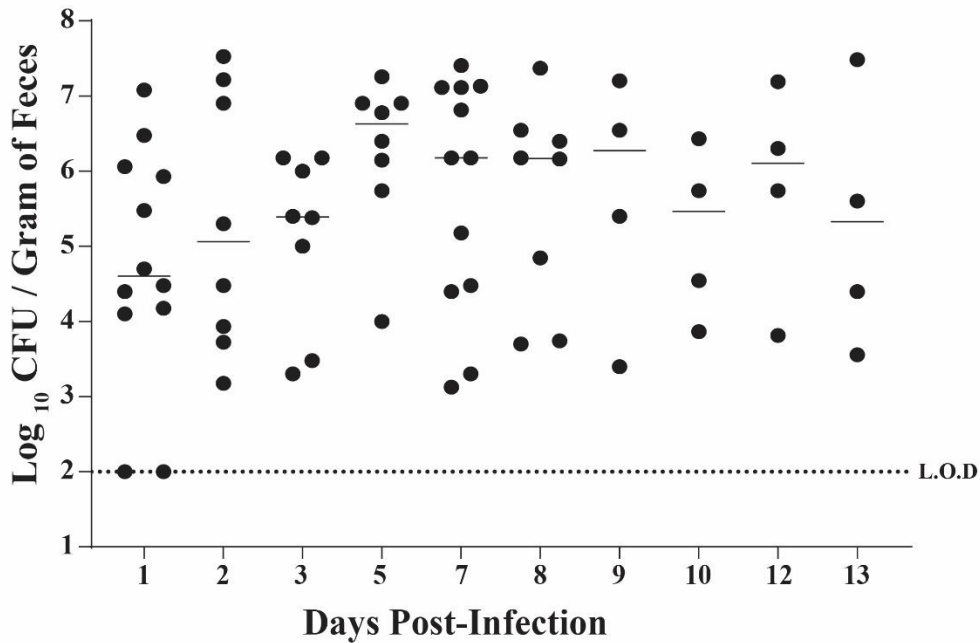

817

818

819

820

821 **Supplemental Figure 4.**

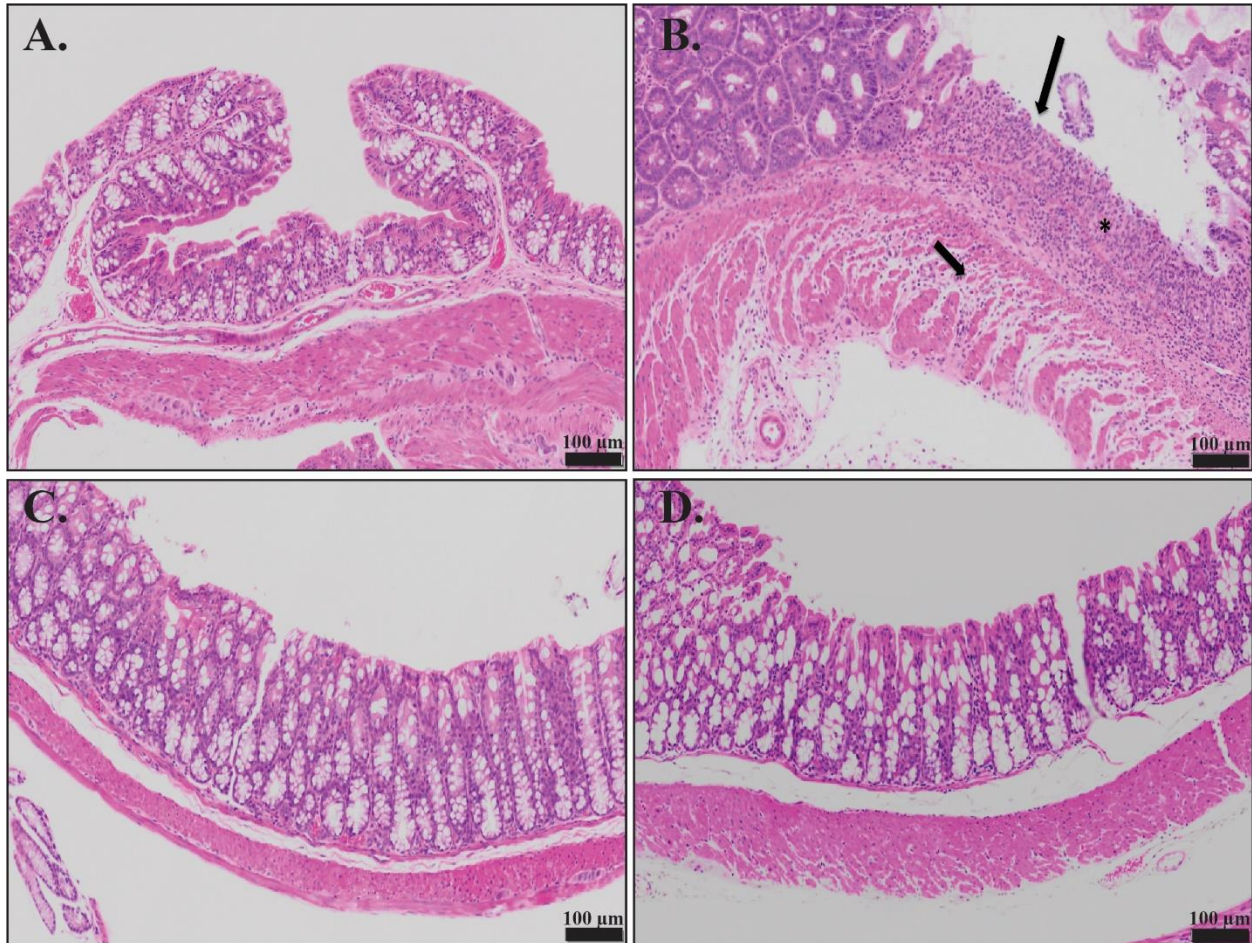

822

823

824

825

826

827

828

829

830

831

832

833

834

835

## 836 References

- 837 1. CDC. 2018. Healthcare-associated Infections. Centers for Disease Control.
- 838 2. Khan HA, Baig FK, Mehboob R. 2017. Nosocomial infections: Epidemiology, prevention, control  
839 and surveillance. *Asian Pacific Journal of Tropical Biomedicine* 7:478-482.
- 840 3. Aslam B, Wang W, Arshad MI, Khurshid M, Muzammil S, Rasool MH, Nisar MA, Alvi RF, Aslam  
841 MA, Qamar MU, Salamat MKF, Baloch Z. 2018. Antibiotic resistance: a rundown of a global crisis.  
842 *Infect Drug Resist* 11:1645-1658.
- 843 4. Paczosa MK, Meccas J. 2016. *Klebsiella pneumoniae*: Going on the Offense with a Strong  
844 Defense. *Microbiol Mol Biol Rev* 80:629-61.
- 845 5. Bergmans DCJJ, Bonten MJM, Gaillard CA, vanTiel FH, vanderGeest S, deLeeuw PW, Stobberingh  
846 EE. 1997. Indications for antibiotic use in ICU patients: a one-year prospective surveillance.  
847 *Journal of Antimicrobial Chemotherapy* 39:527-535.
- 848 6. Sakkas H, Bozidis P, Iliia A, Mpekoulis G, Papadopoulou C. 2019. Antimicrobial Resistance in  
849 Bacterial Pathogens and Detection of Carbapenemases in *Klebsiella pneumoniae* Isolates from  
850 Hospital Wastewater. *Antibiotics (Basel)* 8.
- 851 7. Broberg CA, Palacios M, Miller VL. 2014. *Klebsiella*: a long way to go towards understanding this  
852 enigmatic jet-setter. *F1000Prime Rep* 6:64.
- 853 8. Centers for Disease C, Prevention. 2013. Vital signs: carbapenem-resistant Enterobacteriaceae.  
854 *MMWR Morb Mortal Wkly Rep* 62:165-70.
- 855 9. WHO. 2014. Antimicrobial resistance: global report on surveillance. World Health Organization,  
856 Geneva, Switzerland.
- 857 10. Shon AS, Bajwa RP, Russo TA. 2013. Hypervirulent (hypermucoviscous) *Klebsiella pneumoniae*: a  
858 new and dangerous breed. *Virulence* 4:107-18.
- 859 11. Rodriguez-Villar S, Fife A, Baldwin C, Warne RR. 2019. Antibiotic-resistant hypervirulent  
860 *Klebsiella pneumoniae* causing community- acquired liver abscess: an emerging disease. *Oxf*  
861 *Med Case Reports* 2019:omz032.
- 862 12. Liu C, Guo J. 2019. Hypervirulent *Klebsiella pneumoniae* (hypermucoviscous and aerobactin  
863 positive) infection over 6 years in the elderly in China: antimicrobial resistance patterns,  
864 molecular epidemiology and risk factor. *Ann Clin Microbiol Antimicrob* 18:4.
- 865 13. Fang CT, Lai SY, Yi WC, Hsueh PR, Liu KL, Chang SC. 2007. *Klebsiella pneumoniae* genotype K1: an  
866 emerging pathogen that causes septic ocular or central nervous system complications from  
867 pyogenic liver abscess. *Clin Infect Dis* 45:284-93.
- 868 14. Cheng NC, Yu YC, Tai HC, Hsueh PR, Chang SC, Lai SY, Yi WC, Fang CT. 2012. Recent trend of  
869 necrotizing fasciitis in Taiwan: focus on monomicrobial *Klebsiella pneumoniae* necrotizing  
870 fasciitis. *Clin Infect Dis* 55:930-9.
- 871 15. Han SH. 1995. Review of hepatic abscess from *Klebsiella pneumoniae*. An association with  
872 diabetes mellitus and septic endophthalmitis. *West J Med* 162:220-4.
- 873 16. Dao TT, Liebenthal D, Tran TK, Ngoc Thi Vu B, Ngoc Thi Nguyen D, Thi Tran HK, Thi Nguyen CK,  
874 Thi Vu HL, Fox A, Horby P, Van Nguyen K, Wertheim HF. 2014. *Klebsiella pneumoniae*  
875 oropharyngeal carriage in rural and urban Vietnam and the effect of alcohol consumption. *PLoS*  
876 *One* 9:e91999.
- 877 17. Fung CP, Lin YT, Lin JC, Chen TL, Yeh KM, Chang FY, Chuang HC, Wu HS, Tseng CP, Siu LK. 2012.  
878 *Klebsiella pneumoniae* in gastrointestinal tract and pyogenic liver abscess. *Emerg Infect Dis*  
879 18:1322-5.
- 880 18. Viau RA, Hujer AM, Marshall SH, Perez F, Hujer KM, Briceno DF, Dul M, Jacobs MR, Grossberg R,  
881 Toltzis P, Bonomo RA. 2012. "Silent" dissemination of *Klebsiella pneumoniae* isolates bearing K.

- 882 pneumoniae carbapenemase in a long-term care facility for children and young adults in  
883 Northeast Ohio. *Clin Infect Dis* 54:1314-21.
- 884 19. Gorrie CL, Mirceta M, Wick RR, Edwards DJ, Thomson NR, Strugnell RA, Pratt NF, Garlick JS,  
885 Watson KM, Pilcher DV, McGloughlin SA, Spelman DW, Jenney AWJ, Holt KE. 2017.  
886 Gastrointestinal Carriage Is a Major Reservoir of *Klebsiella pneumoniae* Infection in Intensive  
887 Care Patients. *Clinical Infectious Diseases* 65:208-215.
- 888 20. Snitkin ES, Zelazny AM, Thomas PJ, Stock F, Group NCSP, Henderson DK, Palmore TN, Segre JA.  
889 2012. Tracking a hospital outbreak of carbapenem-resistant *Klebsiella pneumoniae* with whole-  
890 genome sequencing. *Sci Transl Med* 4:148ra116.
- 891 21. Selden R, Lee S, Wang WLL, Bennett JV, Eickhoff TC. 1971. Nosocomial *Klebsiella* Infections -  
892 Intestinal Colonization as a Reservoir. *Annals of Internal Medicine* 74:657-+.
- 893 22. Casewell M, Phillips I. 1977. Hands as Route of Transmission for *Klebsiella* Species. *British*  
894 *Medical Journal* 2:1315-1317.
- 895 23. Chiu CH, Su LH, Wu TL, Hung JJ. 2001. Liver abscess caused by *Klebsiella pneumoniae* in siblings.  
896 *J Clin Microbiol* 39:2351-3.
- 897 24. Harada S, Tateda K, Mitsui H, Hattori Y, Okubo M, Kimura S, Sekigawa K, Kobayashi K, Hashimoto  
898 N, Itoyama S, Nakai T, Suzuki T, Ishii Y, Yamaguchi K. 2011. Familial spread of a virulent clone of  
899 *Klebsiella pneumoniae* causing primary liver abscess. *J Clin Microbiol* 49:2354-6.
- 900 25. Lawley TD, Bouley DM, Hoy YE, Gerke C, Relman DA, Monack DM. 2008. Host transmission of  
901 *Salmonella enterica* serovar Typhimurium is controlled by virulence factors and indigenous  
902 intestinal microbiota. *Infect Immun* 76:403-16.
- 903 26. Lawley TD, Clare S, Walker AW, Goulding D, Stabler RA, Croucher N, Mastroeni P, Scott P, Raisen  
904 C, Mottram L, Fairweather NF, Wren BW, Parkhill J, Dougan G. 2009. Antibiotic treatment of  
905 *Clostridium difficile* carrier mice triggers a supershedder state, spore-mediated transmission,  
906 and severe disease in immunocompromised hosts. *Infect Immun* 77:3661-9.
- 907 27. US Department of Health and Human Services N. 2015. Public Health Service policy on humane  
908 care and use of laboratory animals. US Department of Health and Human Services, NIH,  
909 Arlington, VA.
- 910 28. Tsai YK, Liou CH, Lin JC, Ma L, Fung CP, Chang FY, Siu LK. 2014. A suitable streptomycin-resistant  
911 mutant for constructing unmarked in-frame gene deletions using *rpsL* as a counter-selection  
912 marker. *PLoS One* 9:e109258.
- 913 29. Martin RM, Cao J, Brisse S, Passet V, Wu W, Zhao L, Malani PN, Rao K, Bachman MA. 2016.  
914 Molecular Epidemiology of Colonizing and Infecting Isolates of *Klebsiella pneumoniae*. *mSphere*  
915 1.
- 916 30. Bachman MA, Breen P, Deornellas V, Mu Q, Zhao L, Wu W, Cavalcoli JD, Mobley HL. 2015.  
917 Genome-Wide Identification of *Klebsiella pneumoniae* Fitness Genes during Lung Infection.  
918 *MBio* 6:e00775.
- 919 31. Struve C, Bojer M, Krogfelt KA. 2008. Characterization of *Klebsiella pneumoniae* type 1 fimbriae  
920 by detection of phase variation during colonization and infection and impact on virulence. *Infect*  
921 *Immun* 76:4055-65.
- 922 32. Ramage B, Erolin R, Held K, Gasper J, Weiss E, Brittnacher M, Gallagher L, Manoil C. 2017.  
923 Comprehensive Arrayed Transposon Mutant Library of *Klebsiella pneumoniae* Outbreak Strain  
924 KPNH1. *J Bacteriol* 199.
- 925 33. Armbruster CE, Forsyth-DeOrnellas V, Johnson AO, Smith SN, Zhao L, Wu W, Mobley HLT. 2017.  
926 Genome-wide transposon mutagenesis of *Proteus mirabilis*: Essential genes, fitness factors for  
927 catheter-associated urinary tract infection, and the impact of polymicrobial infection on fitness  
928 requirements. *PLoS Pathog* 13:e1006434.

- 929 34. Nagpal R, Neth BJ, Wang S, Craft S, Yadav H. 2019. Modified Mediterranean-ketogenic diet  
930 modulates gut microbiome and short-chain fatty acids in association with Alzheimer's disease  
931 markers in subjects with mild cognitive impairment. *EBioMedicine* 47:529-542.
- 932 35. Ahmadi S, Nagpal R, Wang S, Gagliano J, Kitzman DW, Soleimani-Zad S, Sheikh-Zeinoddin M,  
933 Read R, Yadav H. 2019. Prebiotics from acorn and sago prevent high-fat-diet-induced insulin  
934 resistance via microbiome-gut-brain axis modulation. *J Nutr Biochem* 67:1-13.
- 935 36. Nagpal R, Newman TM, Wang S, Jain S, Lovato JF, Yadav H. 2018. Obesity-Linked Gut  
936 Microbiome Dysbiosis Associated with Derangements in Gut Permeability and Intestinal Cellular  
937 Homeostasis Independent of Diet. *J Diabetes Res* 2018:3462092.
- 938 37. Caporaso JG, Lauber CL, Walters WA, Berg-Lyons D, Huntley J, Fierer N, Owens SM, Betley J,  
939 Fraser L, Bauer M, Gormley N, Gilbert JA, Smith G, Knight R. 2012. Ultra-high-throughput  
940 microbial community analysis on the Illumina HiSeq and MiSeq platforms. *ISME J* 6:1621-4.
- 941 38. Caporaso JG, Kuczynski J, Stombaugh J, Bittinger K, Bushman FD, Costello EK, Fierer N, Pena AG,  
942 Goodrich JK, Gordon JI, Huttley GA, Kelley ST, Knights D, Koenig JE, Ley RE, Lozupone CA,  
943 McDonald D, Muegge BD, Pirrung M, Reeder J, Sevinsky JR, Turnbaugh PJ, Walters WA,  
944 Widmann J, Yatsunencko T, Zaneveld J, Knight R. 2010. QIIME allows analysis of high-throughput  
945 community sequencing data. *Nat Methods* 7:335-6.
- 946 39. Nagpal R, Shively CA, Appt SA, Register TC, Michalson KT, Vitolins MZ, Yadav H. 2018. Gut  
947 Microbiome Composition in Non-human Primates Consuming a Western or Mediterranean Diet.  
948 *Front Nutr* 5:28.
- 949 40. Segata N, Izard J, Waldron L, Gevers D, Miropolsky L, Garrett WS, Huttenhower C. 2011.  
950 Metagenomic biomarker discovery and explanation. *Genome Biol* 12:R60.
- 951 41. Struve C, Krogfelt KA. 2003. Role of capsule in *Klebsiella pneumoniae* virulence: lack of  
952 correlation between in vitro and in vivo studies. *FEMS Microbiol Lett* 218:149-54.
- 953 42. Favre-Bonte S, Licht TR, Forestier C, Krogfelt KA. 1999. *Klebsiella pneumoniae* Capsule  
954 Expression Is Necessary for Colonization of Large Intestines of Streptomycin-Treated Mice. *Infect*  
955 *Immun* 67:6152-6156.
- 956 43. Perez F, Pultz MJ, Endimiani A, Bonomo RA, Donskey CJ. 2011. Effect of antibiotic treatment on  
957 establishment and elimination of intestinal colonization by KPC-producing *Klebsiella*  
958 *pneumoniae* in mice. *Antimicrob Agents Chemother* 55:2585-9.
- 959 44. Atarashi K, Suda W, Luo C, Kawaguchi T, Motoo I, Narushima S, Kiguchi Y, Yasuma K, Watanabe  
960 E, Tanoue T, Thaiss CA, Sato M, Toyooka K, Said HS, Yamagami H, Rice SA, Gevers D, Johnson RC,  
961 Segre JA, Chen K, Kolls JK, Elinav E, Morita H, Xavier RJ, Hattori M, Honda K. 2017. Ectopic  
962 colonization of oral bacteria in the intestine drives TH1 cell induction and inflammation. *Science*  
963 358:359-365.
- 964 45. Ma LC, Fang CT, Lee CZ, Shun CT, Wang JT. 2005. Genomic heterogeneity in *Klebsiella*  
965 *pneumoniae* strains is associated with primary pyogenic liver abscess and metastatic infection. *J*  
966 *Infect Dis* 192:117-28.
- 967 46. Bobo LD, Dubberke ER. 2010. Recognition and prevention of hospital-associated enteric  
968 infections in the intensive care unit. *Crit Care Med* 38:S324-34.
- 969 47. Aitken C, Jeffries DJ. 2001. Nosocomial spread of viral disease. *Clin Microbiol Rev* 14:528-46.
- 970 48. Chase-Topping M, Gally D, Low C, Matthews L, Woolhouse M. 2008. Super-shedding and the link  
971 between human infection and livestock carriage of *Escherichia coli* O157. *Nat Rev Microbiol*  
972 6:904-12.
- 973 49. Tytgat HLP, Nobrega FL, van der Oost J, de Vos WM. 2019. Bowel Biofilms: Tipping Points  
974 between a Healthy and Compromised Gut? *Trends Microbiol* 27:17-25.
- 975 50. Krogfelt KA, Bergmans H, Klemm P. 1990. Direct evidence that the FimH protein is the mannose-  
976 specific adhesin of *Escherichia coli* type 1 fimbriae. *Infect Immun* 58:1995-1998.

- 977 51. Lau HY, Huffnagle GB, Moore TA. 2008. Host and microbiota factors that control *Klebsiella*  
978 *pneumoniae* mucosal colonization in mice. *Microbes Infect* 10:1283-90.
- 979 52. Sequeira RP, McDonald JAK, Marchesi JR, Clarke TB. 2020. Commensal Bacteroidetes protect  
980 against *Klebsiella pneumoniae* colonization and transmission through IL-36 signalling. *Nature*  
981 *Microbiology* doi:10.1038/s41564-019-0640-1.
- 982 53. Jung HJ, Littmann ER, Seok R, Leiner IM, Taur Y, Peled J, van den Brink M, Ling L, Chen L,  
983 Kreiswirth BN, Goodman AL, Pamer EG. 2019. Genome-Wide Screening for Enteric Colonization  
984 Factors in Carbapenem-Resistant ST258 *Klebsiella pneumoniae*. *MBio* 10.
- 985 54. Kaur CP, Vadivelu J, Chandramathi S. 2018. Impact of *Klebsiella pneumoniae* in lower  
986 gastrointestinal tract diseases. *J Dig Dis* 19:262-271.
- 987 55. Lawlor MS, Handley SA, Miller VL. 2006. Comparison of the host responses to wild-type and *cpsB*  
988 mutant *Klebsiella pneumoniae* infections. *Infect Immun* 74:5402-7.
- 989 56. Moranta D, Regueiro V, March C, Llobet E, Margareto J, Larrarte E, Garmendia J, Bengoechea JA.  
990 2010. *Klebsiella pneumoniae* capsule polysaccharide impedes the expression of beta-defensins  
991 by airway epithelial cells. *Infect Immun* 78:1135-46.
- 992 57. Russell CW, Fleming BA, Jost CA, Tran A, Stenquist AT, Wambaugh MA, Bronner MP, Mulvey MA.  
993 2018. Context-Dependent Requirements for FimH and Other Canonical Virulence Factors in Gut  
994 Colonization by Extraintestinal Pathogenic *Escherichia coli*. *Infect Immun* 86.
- 995 58. Edwards RA, Puente JL. 1998. Fimbrial expression in enteric bacteria: a critical step in intestinal  
996 pathogenesis. *Trends Microbiol* 6:282-7.
- 997 59. Chung DR, Lee H, Park MH, Jung SI, Chang HH, Kim YS, Son JS, Moon C, Kwon KT, Ryu SY, Shin SY,  
998 Ko KS, Kang CI, Peck KR, Song JH. 2012. Fecal carriage of serotype K1 *Klebsiella pneumoniae*  
999 ST23 strains closely related to liver abscess isolates in Koreans living in Korea. *Eur J Clin*  
1000 *Microbiol Infect Dis* 31:481-6.
- 1001 60. Woolhouse ME, Dye C, Etard JF, Smith T, Charlwood JD, Garnett GP, Hagan P, Hii JL, Ndhlovu PD,  
1002 Quinnell RJ, Watts CH, Chandiwana SK, Anderson RM. 1997. Heterogeneities in the transmission  
1003 of infectious agents: implications for the design of control programs. *Proc Natl Acad Sci U S A*  
1004 94:338-42.
- 1005 61. Lawlor MS, Hsu J, Rick PD, Miller VL. 2005. Identification of *Klebsiella pneumoniae* virulence  
1006 determinants using an intranasal infection model. *Molecular Microbiology* 58:1054-1073.
- 1007 62. Palacios M, Broberg CA, Walker KA, Miller VL. 2017. A Serendipitous Mutation Reveals the  
1008 Severe Virulence Defect of a *Klebsiella pneumoniae* *fepB* Mutant. *mSphere* 2.
- 1009 63. Walker KA, Miner TA, Palacios M, Trzilova D, Frederick DR, Broberg CA, Sepulveda VE, Quinn JD,  
1010 Miller VL. 2019. A *Klebsiella pneumoniae* Regulatory Mutant Has Reduced Capsule Expression  
1011 but Retains Hypermucoviscosity. *Mbio* 10.
- 1012 64. Pomakova DK, Hsiao CB, Beanan JM, Olson R, MacDonald U, Keynan Y, Russo TA. 2012. Clinical  
1013 and phenotypic differences between classic and hypervirulent *Klebsiella pneumoniae*: an  
1014 emerging and under-recognized pathogenic variant. *European Journal of Clinical Microbiology &*  
1015 *Infectious Diseases* 31:981-989.
- 1016 65. Agard MJ, Ozer EA, Morris AR, Piseaux R, Hauser AR. 2019. A Genomic Approach To Identify  
1017 *Klebsiella pneumoniae* and *Acinetobacter baumannii* Strains with Enhanced Competitive Fitness  
1018 in the Lungs during Multistrain Pneumonia. *Infect Immun* 87.
